# Supplementary material for: Unusual (2R,6R)-bicyclo[3.1.1]heptane ring construction in fungal α-trans-bergamotene biosynthesis
Source: PubMed Central journal article supplement — iScience. 2022 Mar 10;25(4):104030. doi: 10.1016/j.isci.2022.104030 (PMC8956814; doi:10.1016/j.isci.2022.104030), 2022-03-10
Supplement: mmc1.pdf [file mmc1.pdf]

iScience, Volume 25

## Supplemental information

**Unusual (2*R*,6*R*)-bicyclo[3.1.1]heptane**

**ring construction in fungal**

***α*-trans-bergamotene biosynthesis**

**Yan-Hua Wen, Tian-Jiao Chen, Long-Yu Jiang, Li Li, Mengbo Guo, Yu Peng, Jing-Jing Chen, Fei Pei, Jin-Ling Yang, Rui-Shan Wang, Ting Gong, and Ping Zhu**

## Supplementary Figures

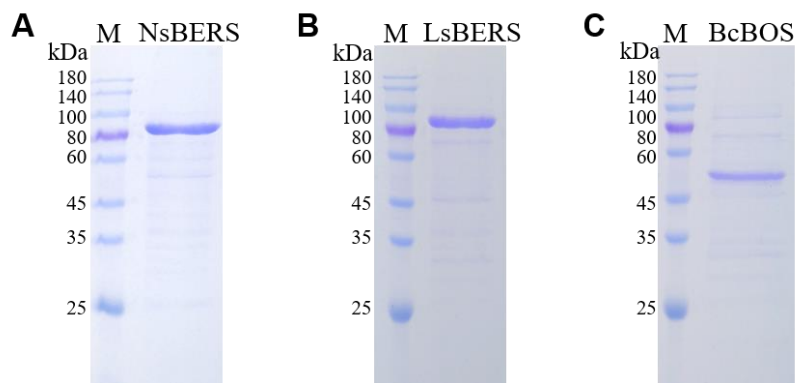

**Figure S1. SDS-PAGE of purified STSs by affinity chromatography, related to Figure 2, Figure 4 and Figure S2.**

(A) MBP-tagged NsBERS (91 kDa); (B) MBP-tagged LsBERS (92 kDa); (C) BcBOS (53 kDa).

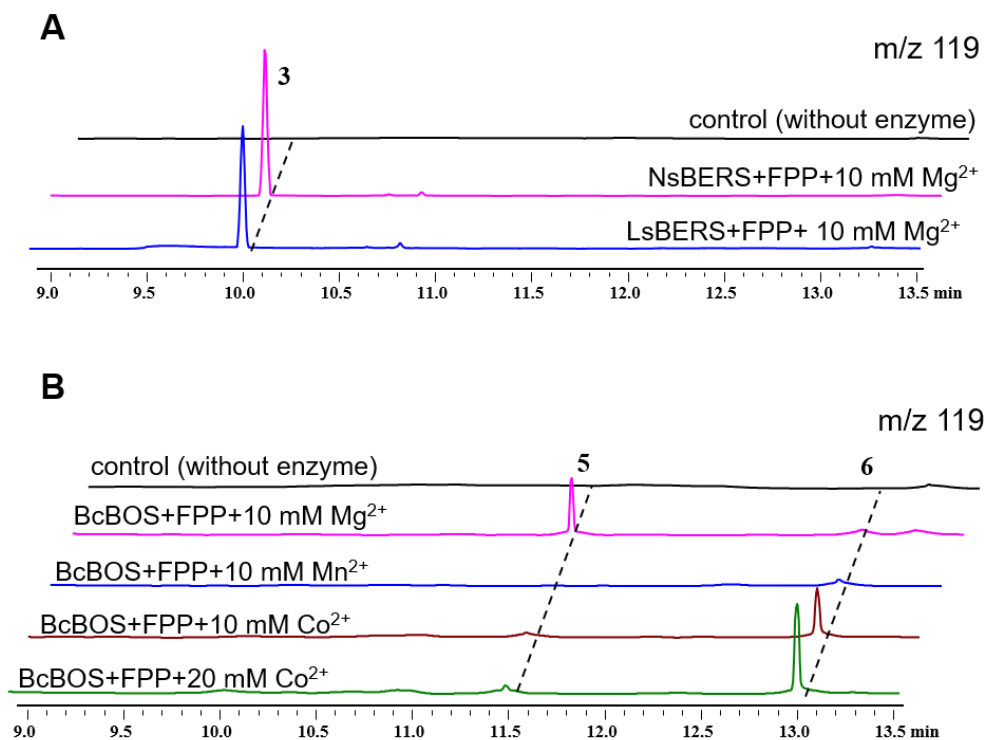

**Figure S2. *In vitro* characterization of NsBERS, LsBERS and BcBOS, related to Figure 2, Figure 4 and Figure S1.**

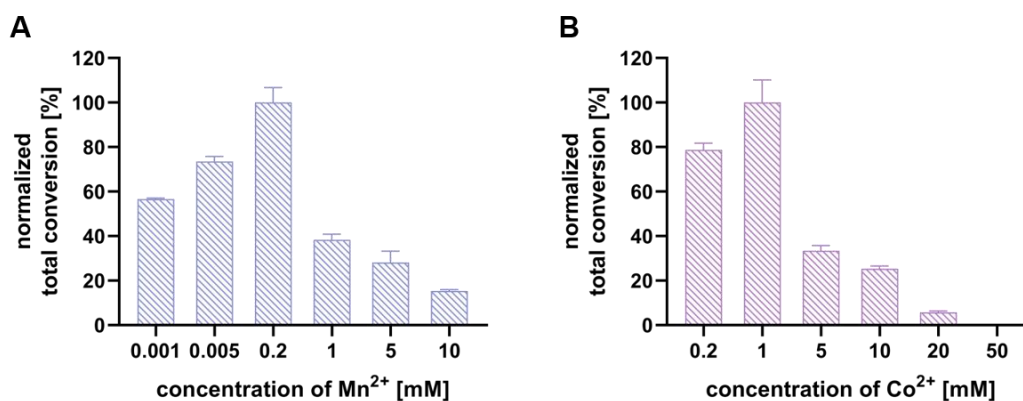

**Figure S3. The optimal concentrations of divalent metal ions assay of NsBERS, related to Figure 2, Figure S1 and Figure S2.**

The corresponding peak of **3** was integrated in each sample and normalized with the average conversion of optimal concentrations, respectively.

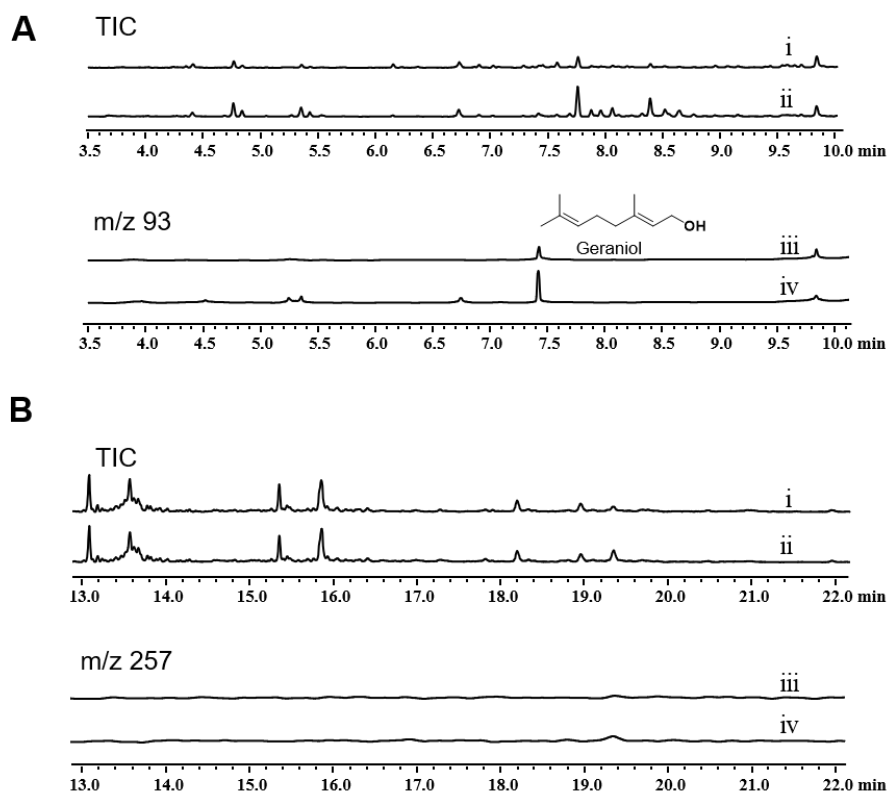

**Figure S4. Substrate promiscuity assay of NsBERS, related to Figure 2 and Figure S1.**

(A) GC-MS analysis of *n*-hexane layers from *in vitro* biochemical reactions of GPP without (i, iii) or with NsBERS (ii, iv); (B) GC-MS analysis of *n*-dodecane layers from *in vitro* biochemical reactions of GGPP without (i, iii) or with NsBERS (ii, iv).

```

NsBERS/1-435 1 -----MKSE---LYWF IWSGTNNKSEA I APLTPP----PPVRLQNKPSQAKKH ITD I VASHEDLKY INR IRYAYDPVSPAAPY LNP I -LFF-- 79
LsBERS/1-444 1 -----MSLPSF---FNWQ IRRSTRPRVPSPASSASDSSGSSASSASTHOTKRNLT K-VVSPGDSAH I SR I KYAYDPVPEVPOYLSPL -PFE-- 84
BcBOS/1-441 1 MAQIMTSAESLPEFS I SFNWFQKNDG I HQ-----DSRSPPPVLS S-TTKSQ I D-LKRVTETPKDLPY I SR I EYVHDVPEVPCHLTKLPLP-- 86
AaTPS/1-418 1 -----MLVPRSHMS-----PDLTYTEVNGNL AARENASWFSR VRFAYDVLWEDAI I EHLTAVPLK I R 56
Hyp3/1-372 1 -----MR I TCSPDPVGI SFOTKQENFE----- 25
FIAAS/1-371 1 -----MPHKDLP I RRLVRAFDPVGPDT LGPPDLDFAS-- 32
FgFS/1-371 1 -----MPHKHVP L R V K L T F D P V G S N T L G V P T L D F E S -- 32

NsBERS/1-435 80 -----FPSQ---ASRPCQM-ANSVR IYFLRGLLYRYS LDYVRGCKHFRANI OESTD L LGG I MRKSA GDI PVGTAK I T I SKL -AKHEL R PGI ED RM 167
LsBERS/1-444 85 -----FPHY---ATKSCAYATLNAVK I K PRAELPYRS LDYVRGNKNKANLDESVK L LEL I VADKAAALDEEVGK -G I T I SKI -AKKEL R PGL EHRM 172
BcBOS/1-441 87 -----FPQY---ASTDCCQYTSVNSVRVNRRAAGL PYRSR FEL I RAS I HWKANVDETK K M L E L I I ADHSSTSVGM R-DGLT I LAGL -AKKEL R PGL EHRV 174
AaTPS/1-418 57 TDSPLASPKPSNVKEQS I TENNENSFS I SPQLTBLPWPTS FTKVRQNRHWQSLR I STQ L L E L F A A D T S A Q -AVRRNGVSLAR I -ASHELQ TDEEDRF 153
Hyp3/1-372 154 TKFATM I I FEANEERMKL LAAT I VY I I I F D D S W E M H S E -D T L G L V R D D I F R R L R G D I E G M A E - -H Q T P L Q Q L I N S T V Q G F K D D K T M S N G G E V L D R L I 249
FIAAS/1-371 33 -----LFRE---RNVPE- DAPLTLYPEQLNVPWHTS LPWT R Q S K W V Q G E A A G R D L V N R I S A D K A S E R G A L P V - -E F M D E -R R K G K I D E L V E D A 114
FgFS/1-371 33 -----LFRE---DSVSE- DAPLV I Y E D M E V A W N T S L P W T R Q S K W Y A E A A G Y E M A N G I S L K A S E R G T L P M - -E F M D E -R R K W K I D E L V E D A 114

                                DDXXE

NsBERS/1-435 168 MLATNMF I FADARRVK I I AVLM I M Y I I F D D K V E E T P E G A Q L N H F R N D F L N H F Q D P G V L S T E P - -T S D F H R H T R E T M T A I W E E D I S N G G G R E M I E A L R 264
LsBERS/1-444 173 VVATSYMFF I FADERRLRQ I ATLM I M Y I F V D D K V E E T P E G S P L S N F R T D F L R R F R E P S S V E S D V S T M S E L Q H H L D F T V R I I G E E D S I S N G G K E M L E A L M 271
BcBOS/1-441 175 VLATSYM Y I FANERRAR I I AATMMLL E I Y D D K M E E T P E G L S F T N S R E Q L D Y F K K E N D V M A S D S T S D F Q R H L K S T M S A I A D E D E I S N G G K E M I E A M I 273
AaTPS/1-418 154 TKFATM I I FEANEERMKL LAAT I VY I I I F D D S W E M H S E -D T L G L V R D D I F R R L R G D I E G M A E - -H Q T P L Q Q L I N S T V Q G F K D D K T M S N G G E V L D R L I 249
Hyp3/1-372 113 VSAPMNMFF I ANAPRAR I I MAKANLL I I F M H D D V C Y Q V S G S T I D S A L - - - - -A D T S T P N G K G A D I L W Q N R I I F K E F S E E T N R E D P V V G P Q F L Q G I L N W V 205
FIAAS/1-371 115 VSCAVLY I SSSPTR I ELLTQALLL I F H D D V M E R G A T Q D D A T V C - - - - -D D F V T M I P K N K H M K R Y F A E V L E C D P I L P G L L R A I G L F V 198
FgFS/1-371 115 I S C C A Y L Y T S S P T R L A L L T Q S V L L L L H D D V I E R G A T Q N E T T V V - - - - -D E F L S M A P K N R H L K K F W S D V L E C D P V L G P D L L Y A I H A F V 198

                                NSE

NsBERS/1-435 265 DAFRCVHP---NGDFTS VEDY LQFR L L N V G A R F V I A A A K F T I K S S V D V K D -P R L S R Y L G I I G D H L G I I N D M A S F D K E S R A L E Q E T Q D M I N V A S V I Q K L L 360
LsBERS/1-444 272 AAFHCVHP---DGDFHSLEDY LKFR L L N V G A R F V I A A A K F S I K S S V D V K D -P R F A R Y L S L V G D H Y G I I N D M A S Y D K E S K A L R E G E T Q D M I N I V A F Q T L L 367
BcBOS/1-441 274 GGFRCVHP---NGEFQSL E E Y L S F R L L N V G A Q Y V I A A A K F T I K S S V D D D -P R F A R Y L R L I G D H L G I I N D M A S Y E K C R A R K E G R H Q N M V N I V A F Q H R 369
AaTPS/1-418 250 DFCEHPVP---QTKFATMGDYLSYR L I D V A F P Y L L A C I K E S L G S S V D V D -P K L A P I L R L V S D H V S L V N D L A S Y D K E K R A Y D N G S A C Y L I N A V D A Q R F I 345
Hyp3/1-372 206 EHTKALFAS -M T E R S F N E I D Y R I G D F A V D C D A A I L L T C E I F L T P A D M E P L R K L H R L Y M T H S L T N D L Y S F N K E V V A E Q E T -G S A V I N A R V L E Q A V 302
FIAAS/1-371 199 NAGRKKS F K Q D K Y A T L A E Y L D Y R R H D I A K P F M I A A I R G S S V Q R T P E E T A P F A E L E D L Y V Q S I L I N D L Y S Y D K E M Y E A R T I -N G S V N A H V I E K I M 296
FgFS/1-371 199 R D G E V K S F K Q D H Y A T L A D M L Y R S N D V G K T F M I A A I R G S S V Q Q T R E E L A P F D E L A D L Y V R S I L I N D L Y S Y D K E V H E V K T I -D A S I V A M A V T E Q L 296

NsBERS/1-435 361 SLQSM E A A A A S Y A Q L Q V E Y W I M E E I K R L E R E E D L D E E W W L E A V E L T A T G N T F C M T S A R Y G G Q C A A I D P S W - - 435
LsBERS/1-444 368 SLP D A R A A A A A Y G Q L Q V E A W I V E E I E A L E S F G K S D E D W W V E A V L L S A T G N V F C M T S S R Y G G Q A A M I E P Q Y T S 444
BcBOS/1-441 370 SLPSAEAKAAAYTYQLQVESW I I E E V E M L A A R G D L D E E W W I E A V F M T A T G N A F C M T S S R Y G G D A A K L T - - - - 441
AaTPS/1-418 346 SLPSAEAKALTYSMQLLVEAQ I K T E L D S L V A G S I S C E E L R L D A L M A S N V Y S V S S R Y G G K A A K L E K - - - - 418
Hyp3/1-372 303 DTS -T R S A K V L R A F L W D L E Q I H D E L T R L -K G T D L T P S Q W R A R G M V E V C A G N I F Y S A T C L R A K P L R G I - - - - 372
FIAAS/1-371 297 CVP -P H L A R T I T R T M S F D V E K K Y A S E R F M R D P A L N D K Q R T Y V I L F D C L T G N L F H H A T L G R Y S R Y A E Y V D C K T - 371
FgFS/1-371 297 S V S -P D L A K N L T R A I T F D M E K E F Y G I C E K F M H S P D I N D R Q R V E T A L F A L D A T G N I H S A T L S R Y V R H G E R P L P C K C - 371

```

Figure S5. Multiple sequence alignment of characterized TPSs in Clade III, related to Figure 2 and Figure 3.

The multiple sequence alignment was generated using Clustal Omega and edited with Jalview.

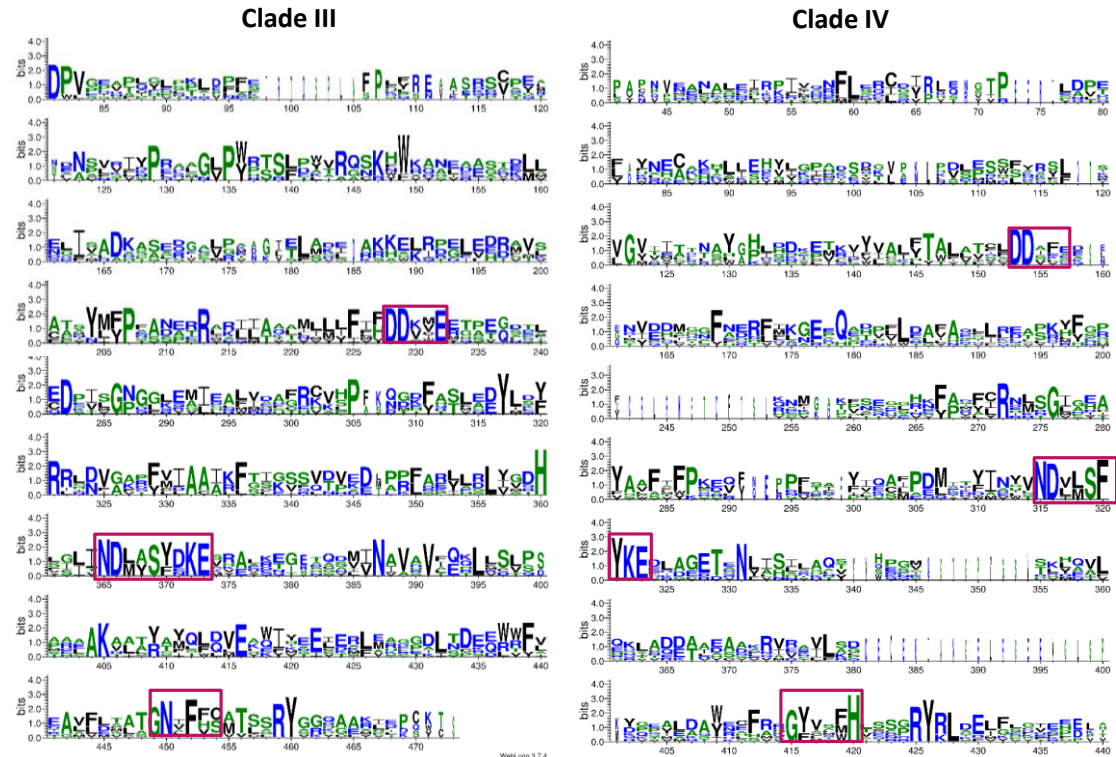

Figure S6. Conserved sites analysis of identified STSs in Clade III and Clade IV, related to Figure 3.

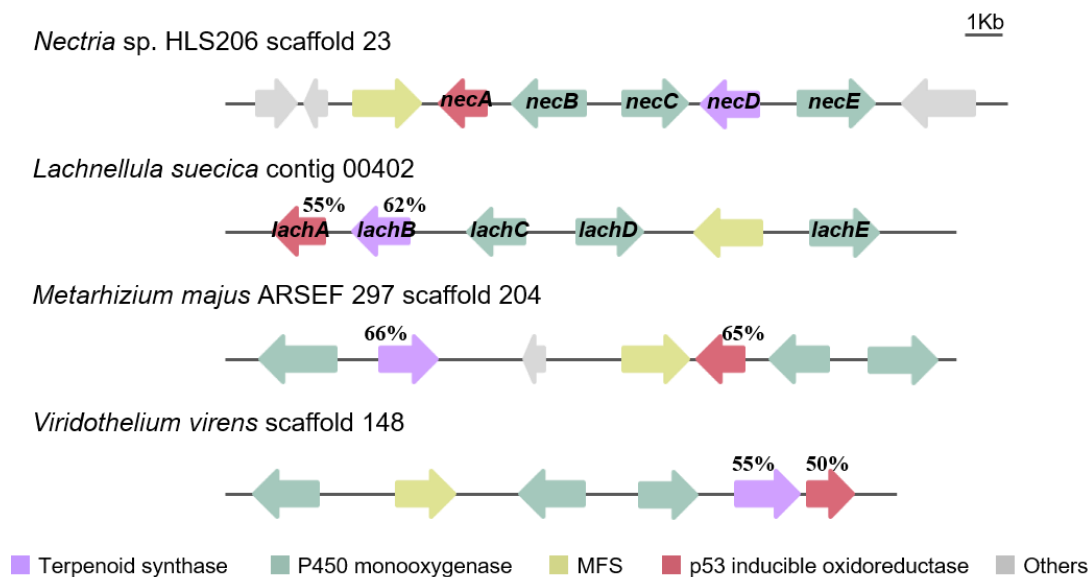

**Figure S7. Homologous gene clusters of *nec* cluster, related to Figure 2.**

The PIG3 variants, NsBERS-like enzymes and cytochrome P450s monooxygenases co-localized in many phytopathogen BGCs.

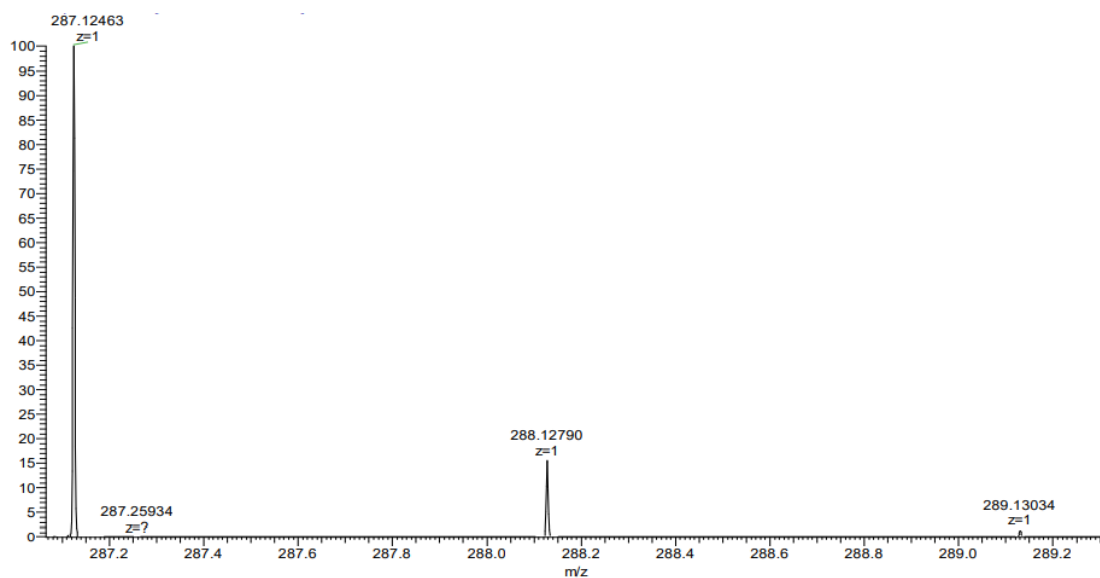

| m/z       | Theo. Mass | Delta (ppm) | RDB equiv. | Composition   |      |
|-----------|------------|-------------|------------|---------------|------|
| 287.12463 | 287.12538  | -2.61       | 5.5        | C15 H20 O4 Na | M+Na |

**Figure S8. HRESIMS spectrum of 1, related to Figure 1.**

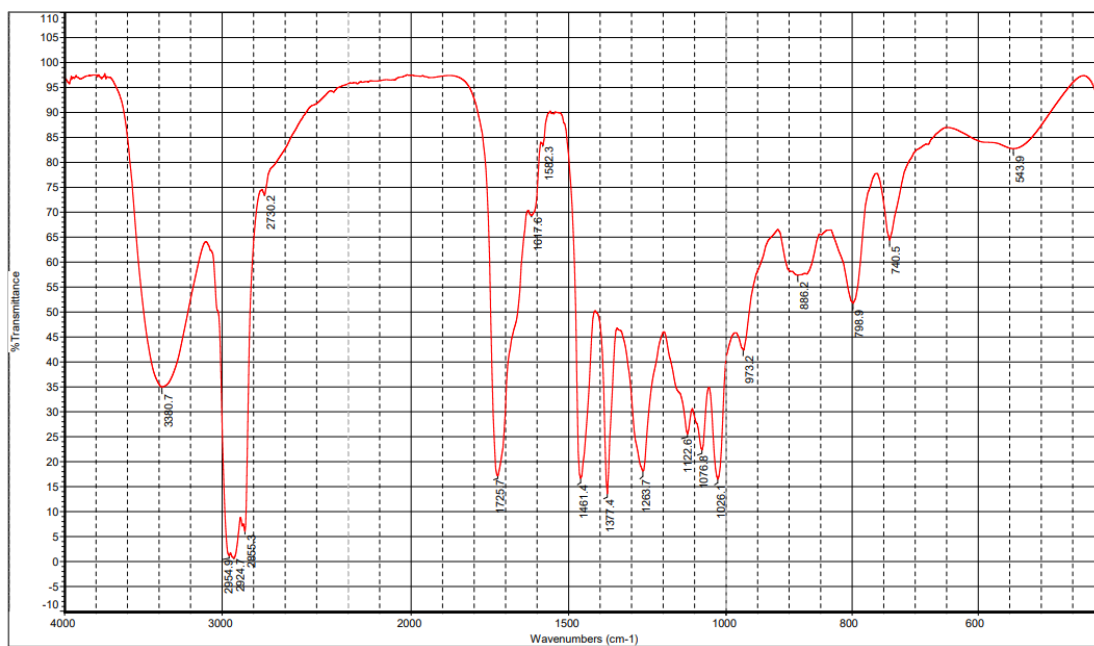

Figure S9. IR spectrum of 1, related to Figure 1.

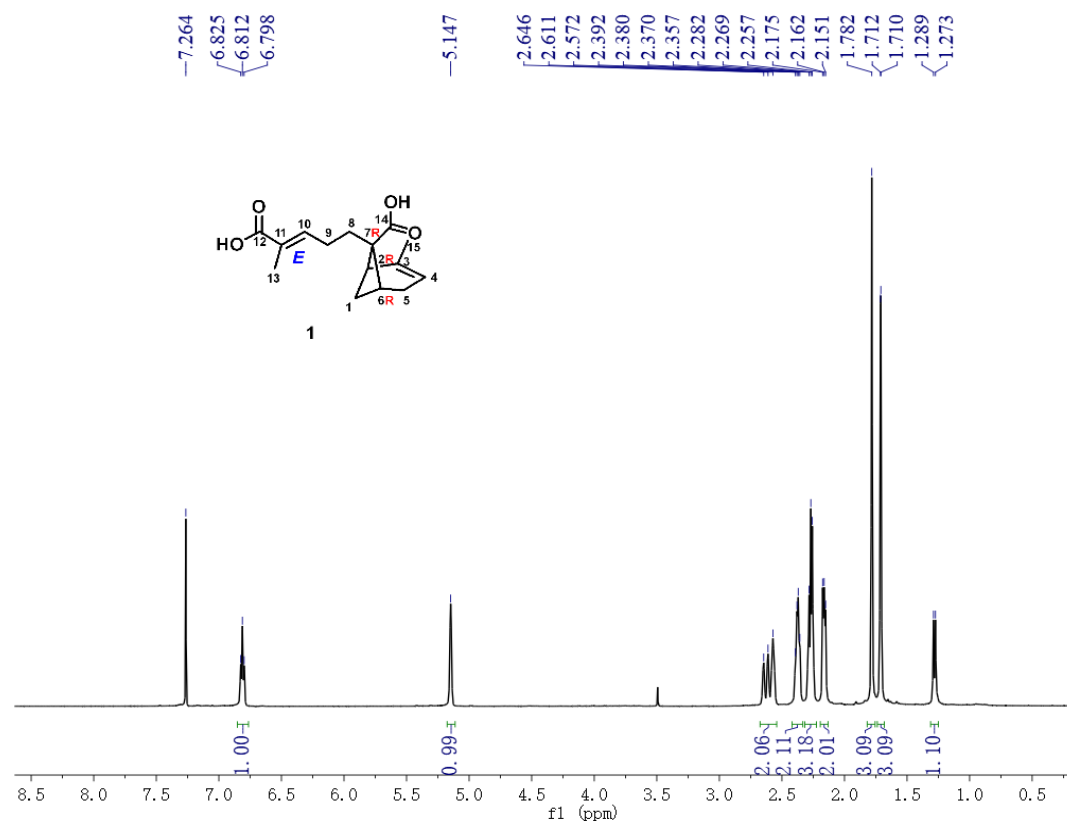

Figure S10. <sup>1</sup>H NMR spectrum (500 MHz) of 1 in CDCl<sub>3</sub>, related to Figure 1 and Table 1.

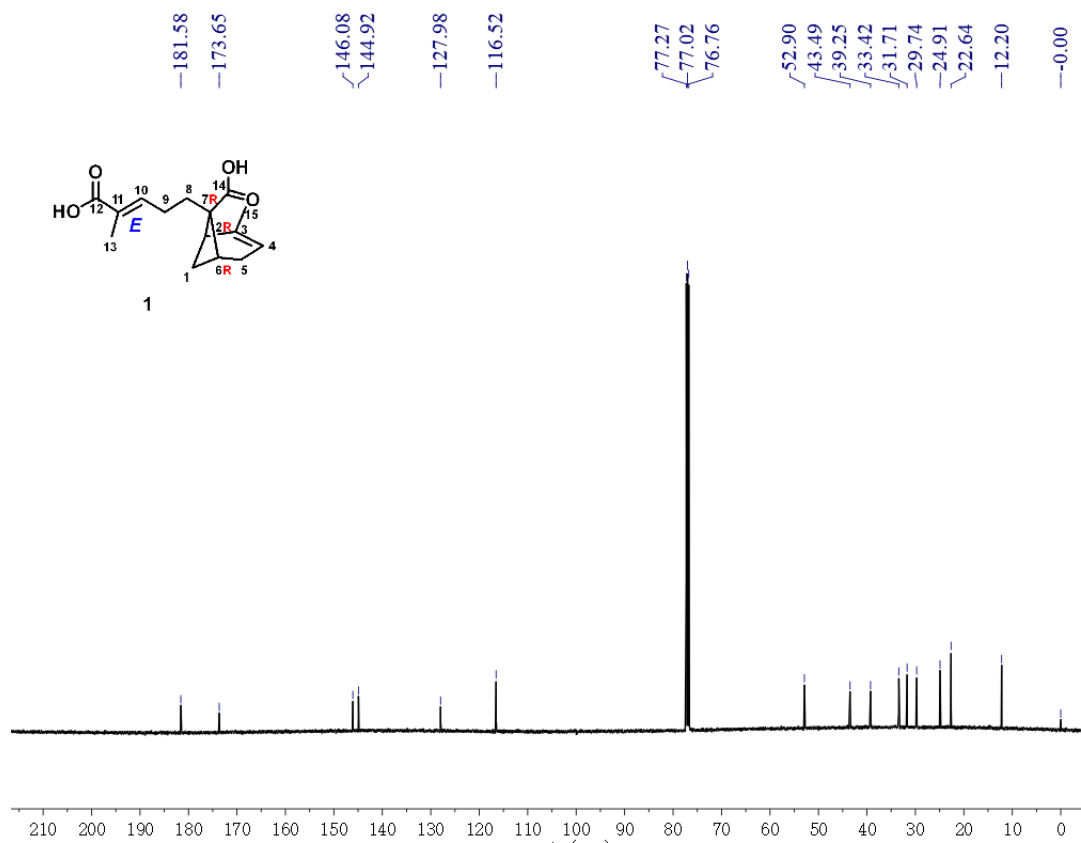

Figure S11.  $^{13}\text{C}$  NMR spectrum (125 MHz) of **1** in  $\text{CDCl}_3$ , related to Figure 1 and Table 1.

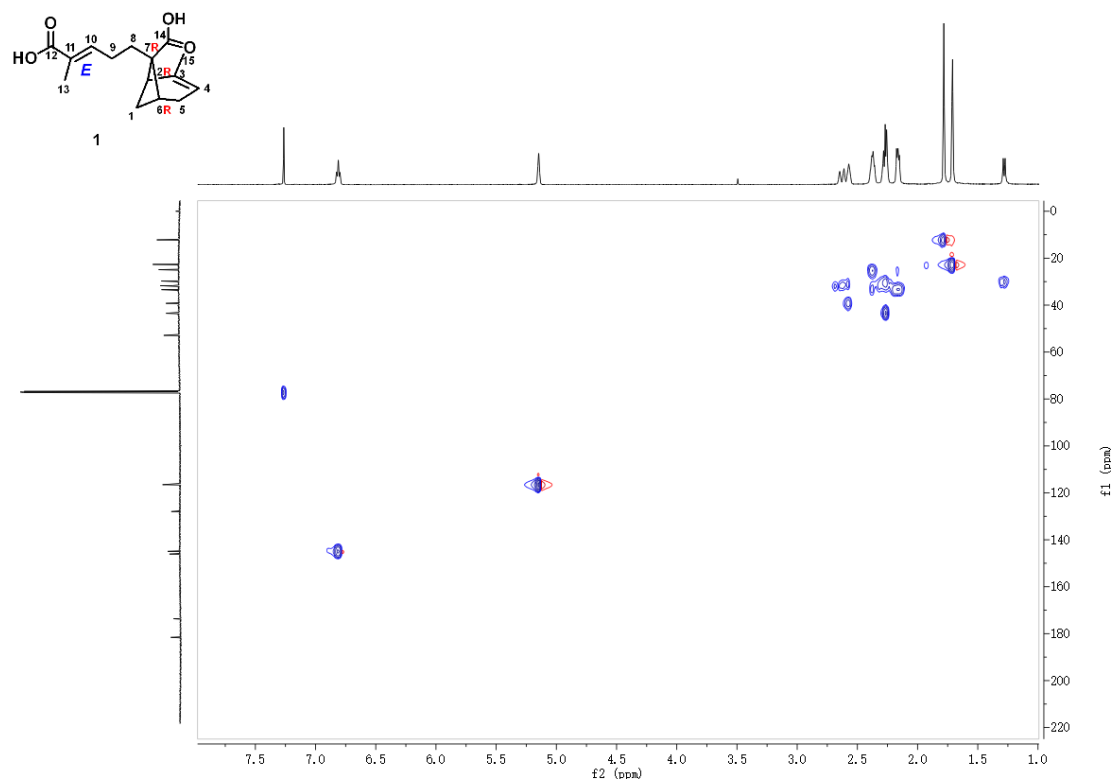

Figure S12. HSQC spectrum of **1** in  $\text{CDCl}_3$ , related to Figure 1.

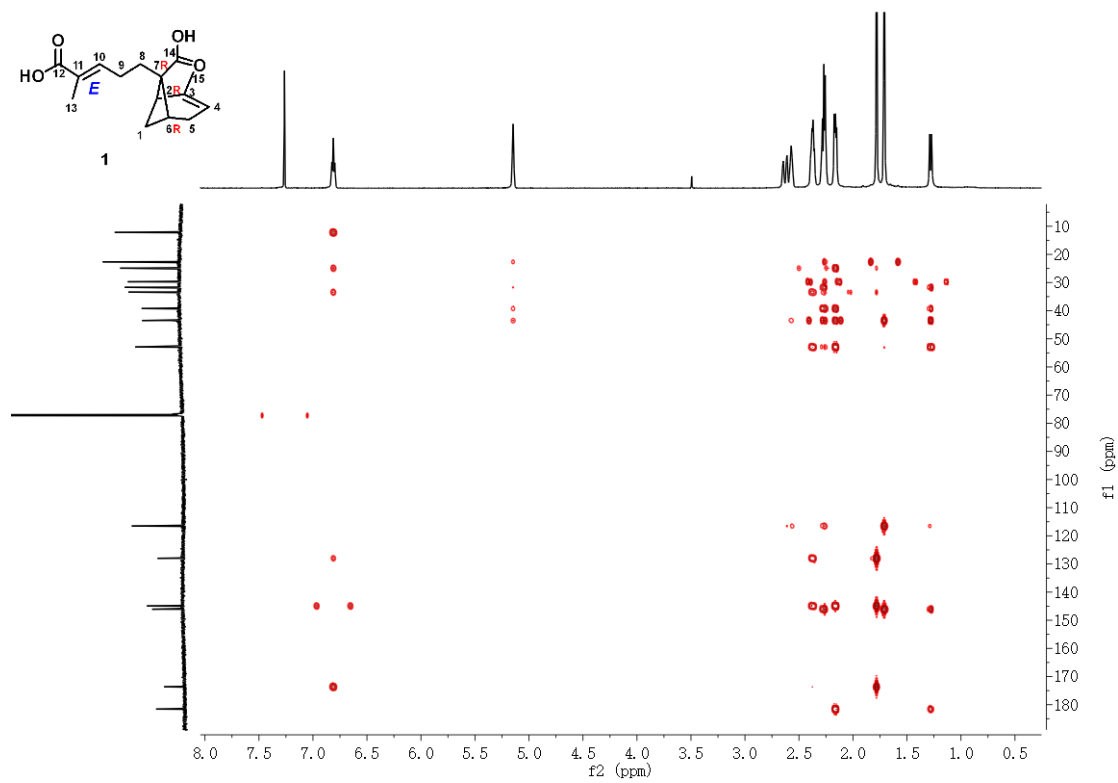

Figure S13. HMBC spectrum of 1 in  $\text{CDCl}_3$ , related to Figure 1.

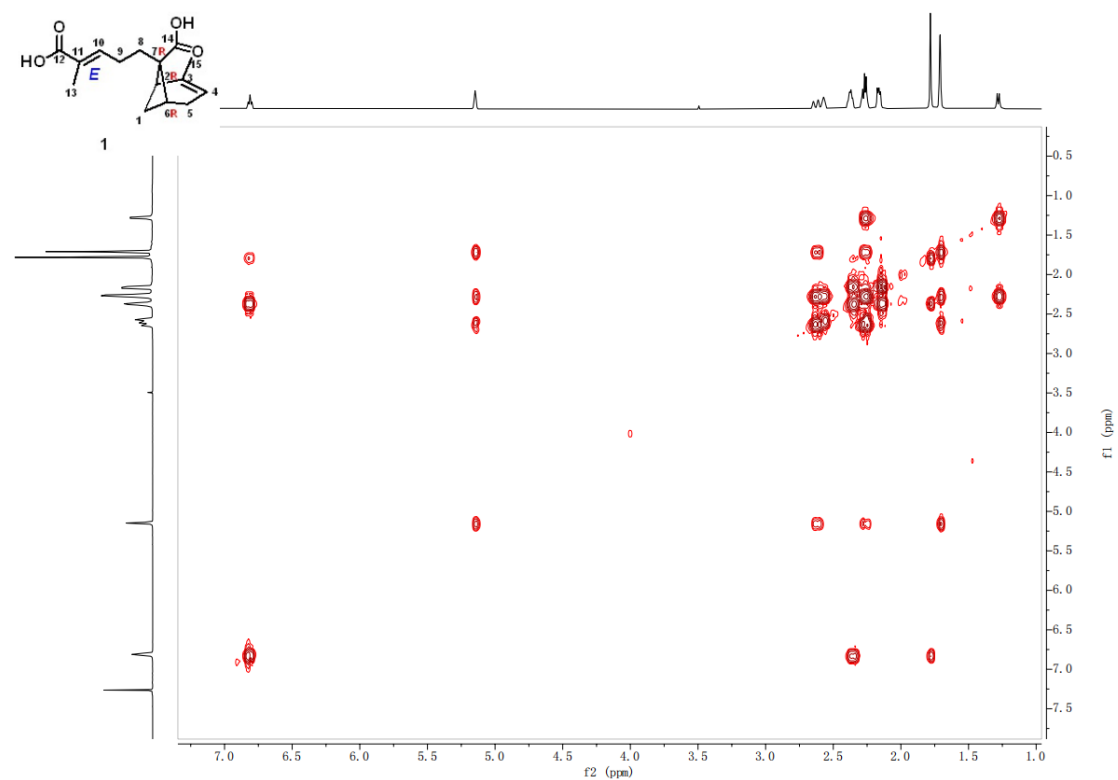

Figure S14.  $^1\text{H}$ - $^1\text{H}$  COSY spectrum of 1 in  $\text{CDCl}_3$ , related to Figure 1.



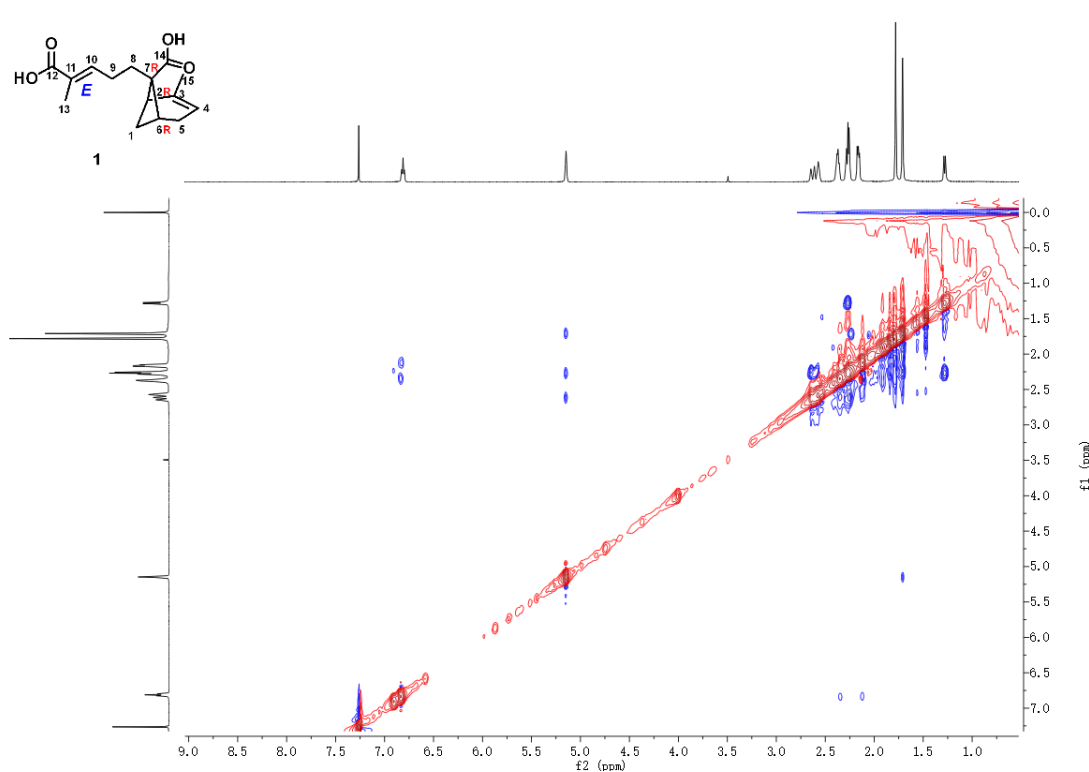

Figure S15. ROESY spectrum of **1** in  $\text{CDCl}_3$ , related to Figure 1.

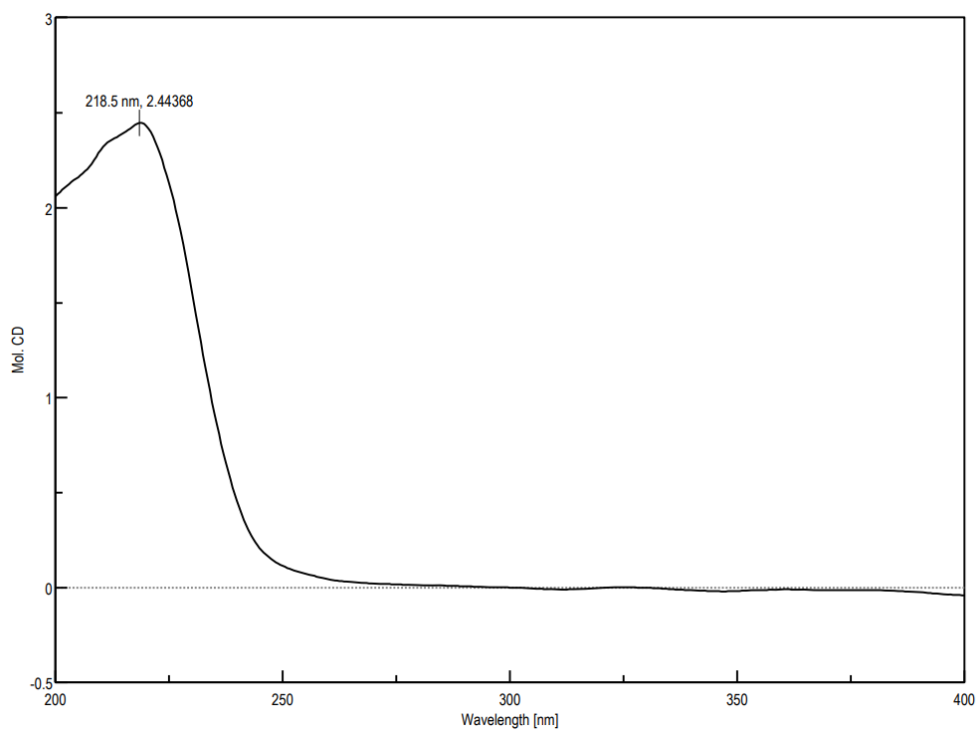

Figure S16. CD spectrum of **1** in  $\text{CH}_3\text{OH}$ , related to Figure 1.

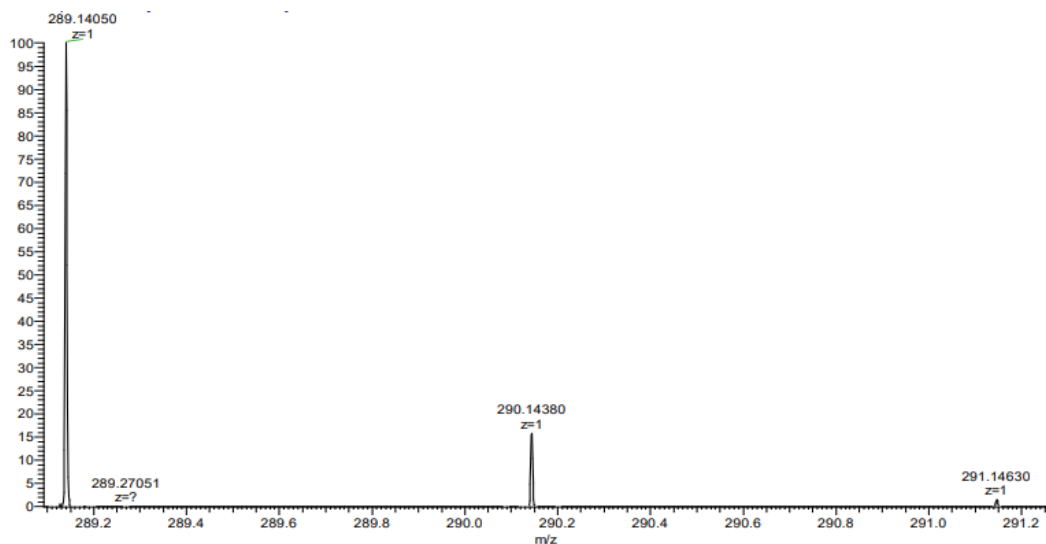

| m/z      | Theo. Mass | Delta (ppm) | RDB equiv. | Composition   |      |
|----------|------------|-------------|------------|---------------|------|
| 289.1405 | 289.14103  | -1.83       | 4.5        | C15 H22 O4 Na | M+Na |

Figure S17. HRESIMS spectrum of 2, related to Figure 1.

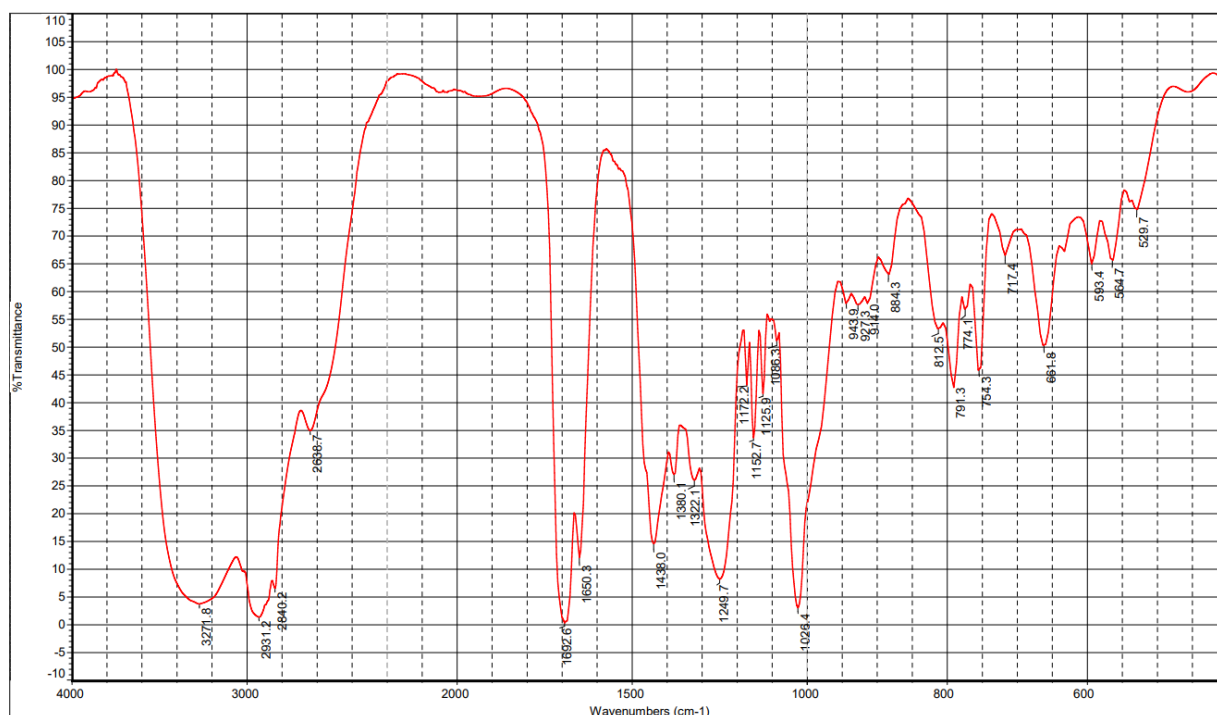

Figure S18. IR spectrum of 2, related to Figure 1.

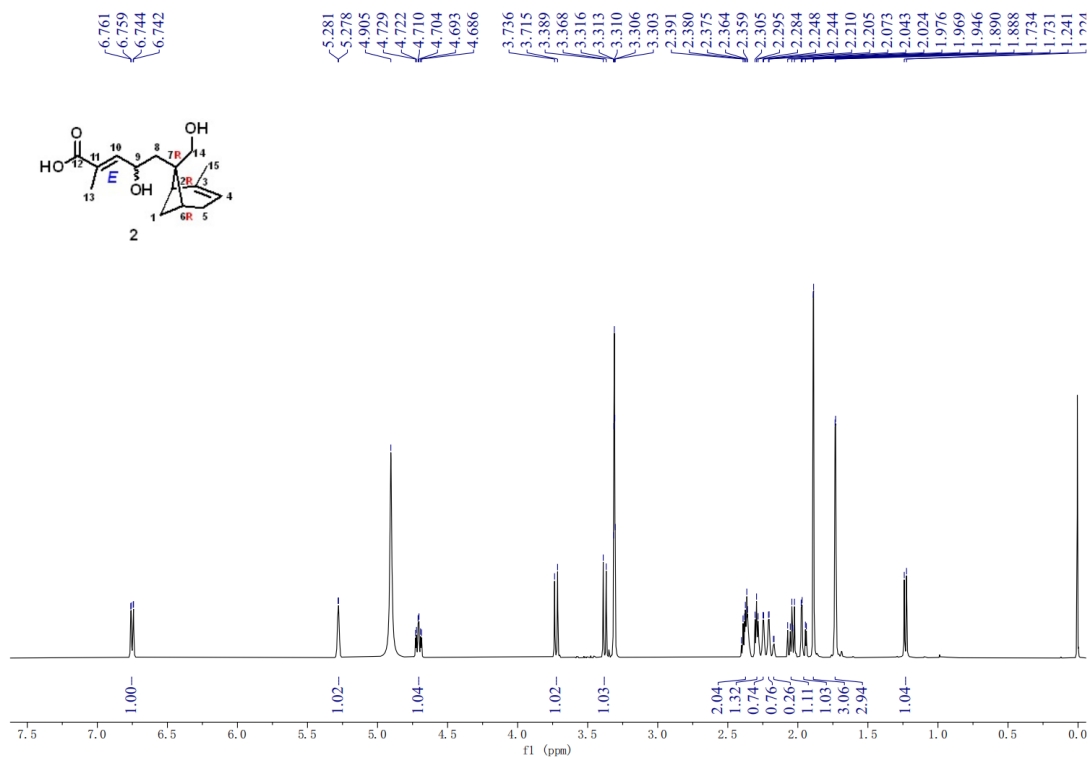

Figure S19. <sup>1</sup>H NMR spectrum (500 MHz) of 2 in CD<sub>3</sub>OD, related to Figure 1 and Table 1.

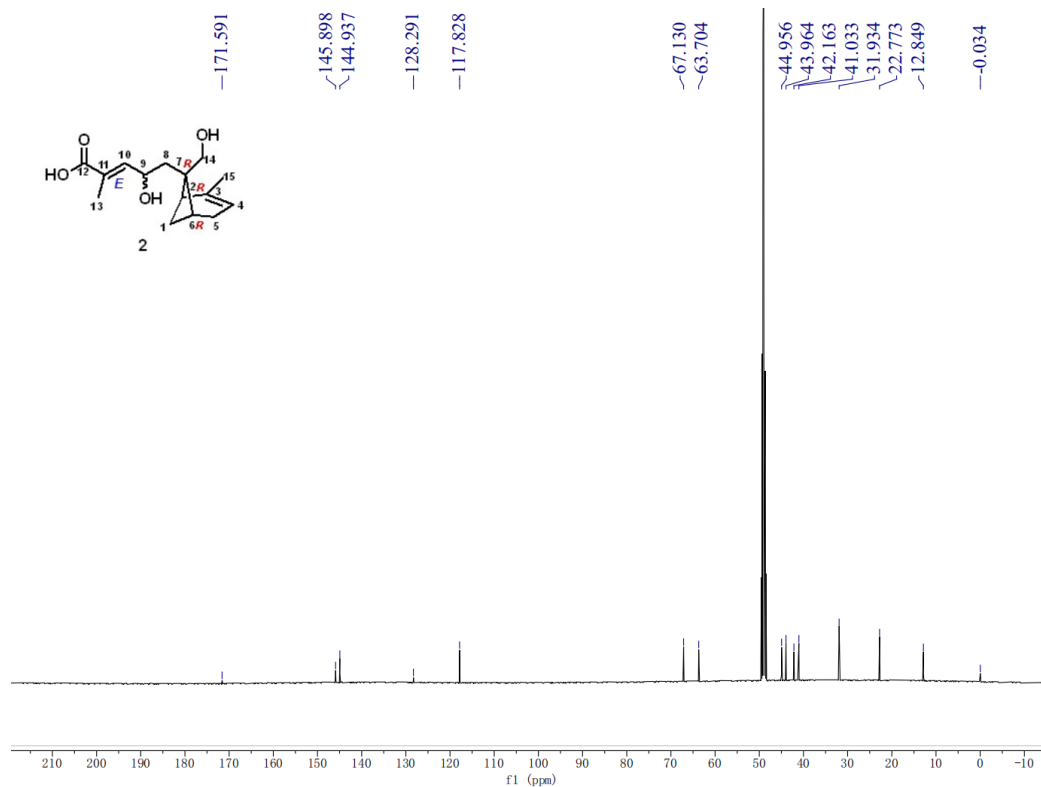

Figure S20. <sup>13</sup>C NMR spectrum (125 MHz) of 2 in CD<sub>3</sub>OD, related to Figure 1 and Table 1.

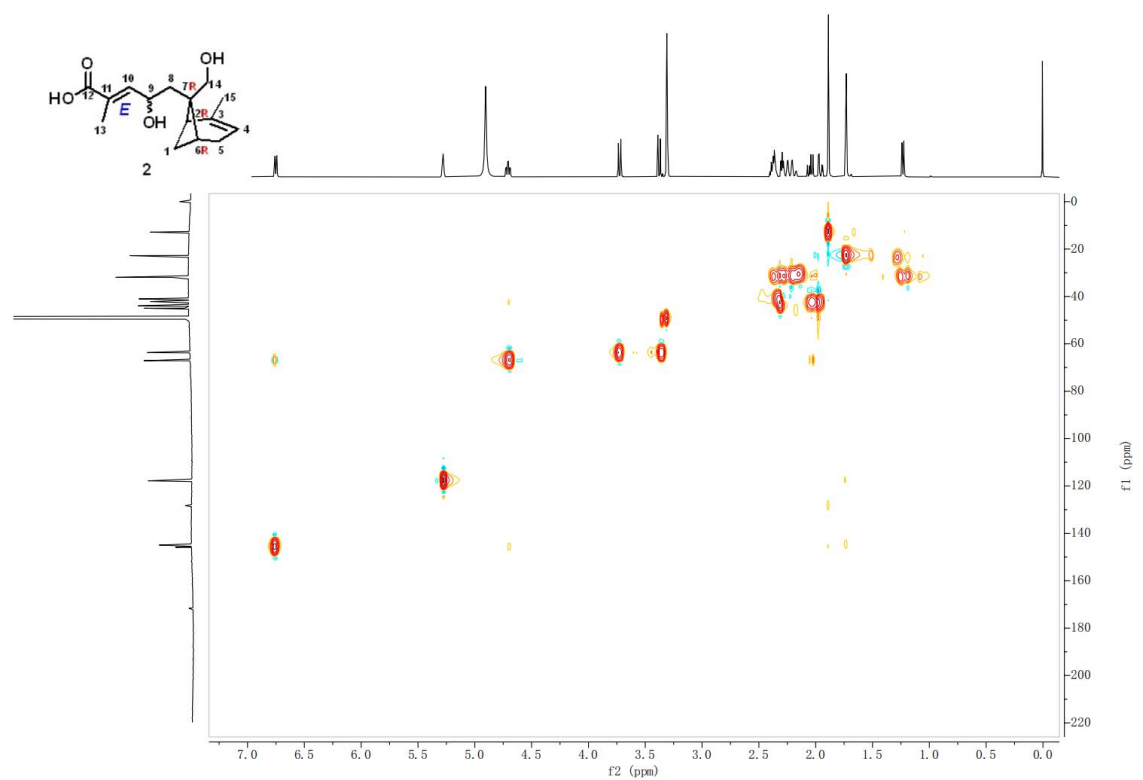

Figure S21. HSQC spectrum of 2 in CD<sub>3</sub>OD, related to Figure 1.

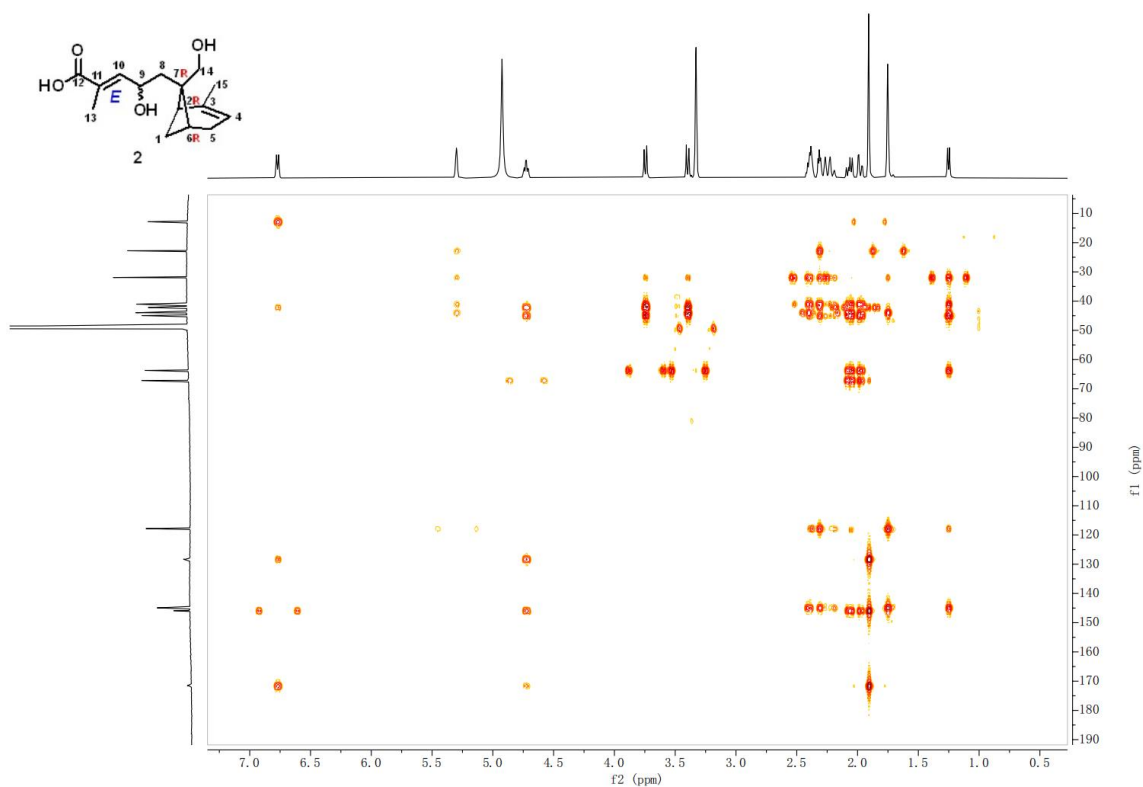

Figure S22. HMBC spectrum of 2 in CD<sub>3</sub>OD, related to Figure 1.

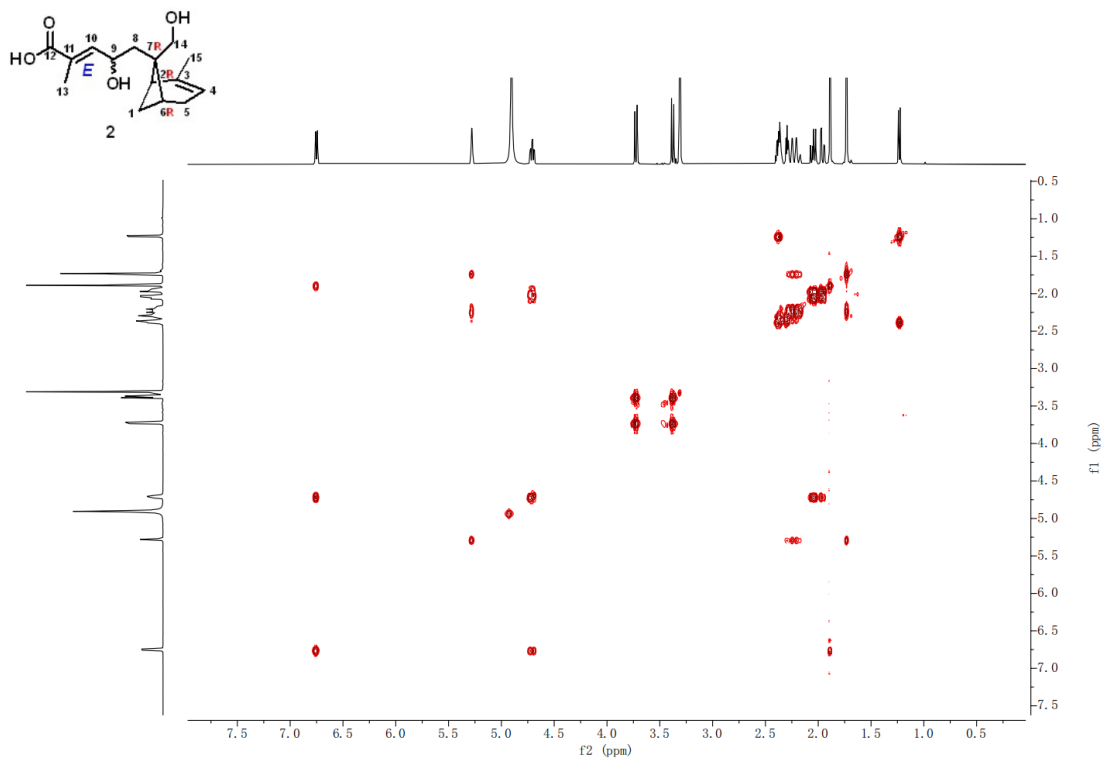

Figure S23.  $^1\text{H}$ - $^1\text{H}$  COSY spectrum of **2** in  $\text{CD}_3\text{OD}$ , related to Figure 1.

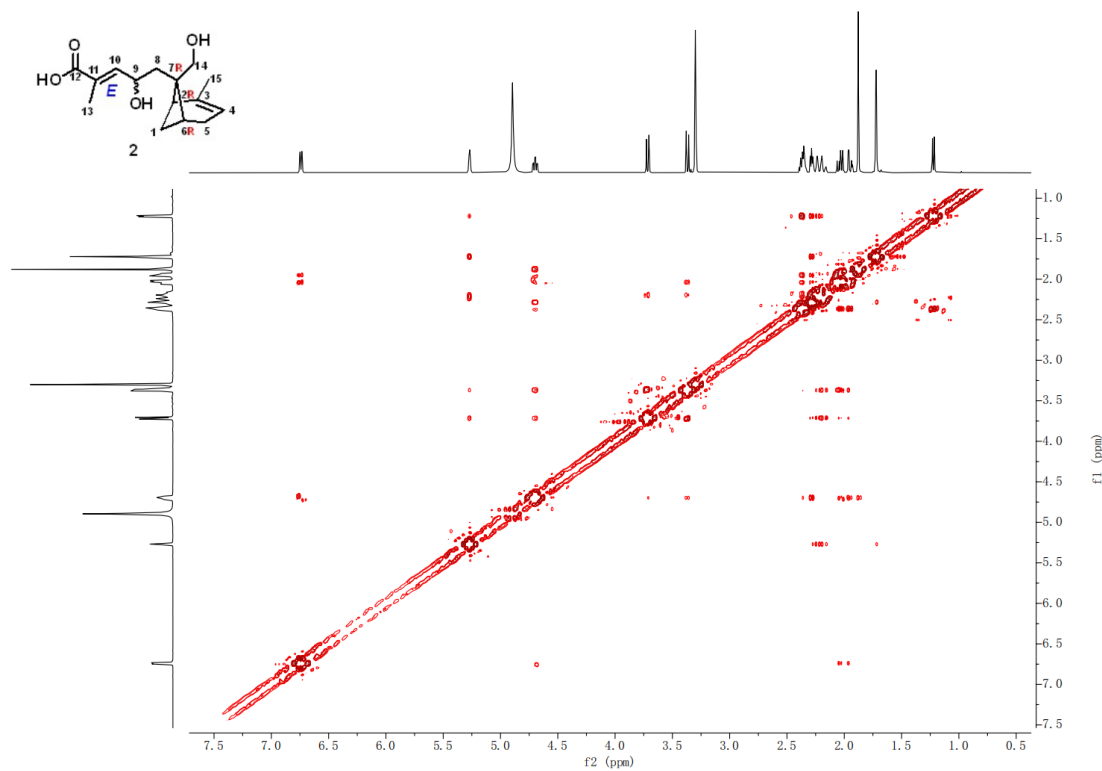

Figure S24. ROESY spectrum of **2** in  $\text{CD}_3\text{OD}$ , related to Figure 1.

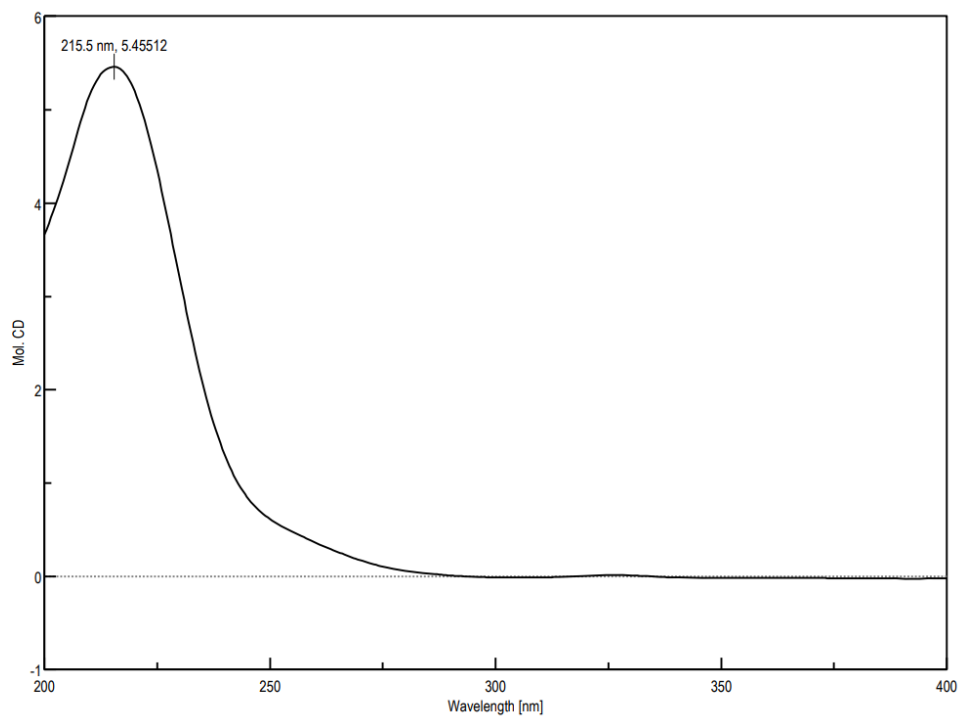

Figure S25. CD spectrum of 2 in CH<sub>3</sub>OH, related to Figure 1.

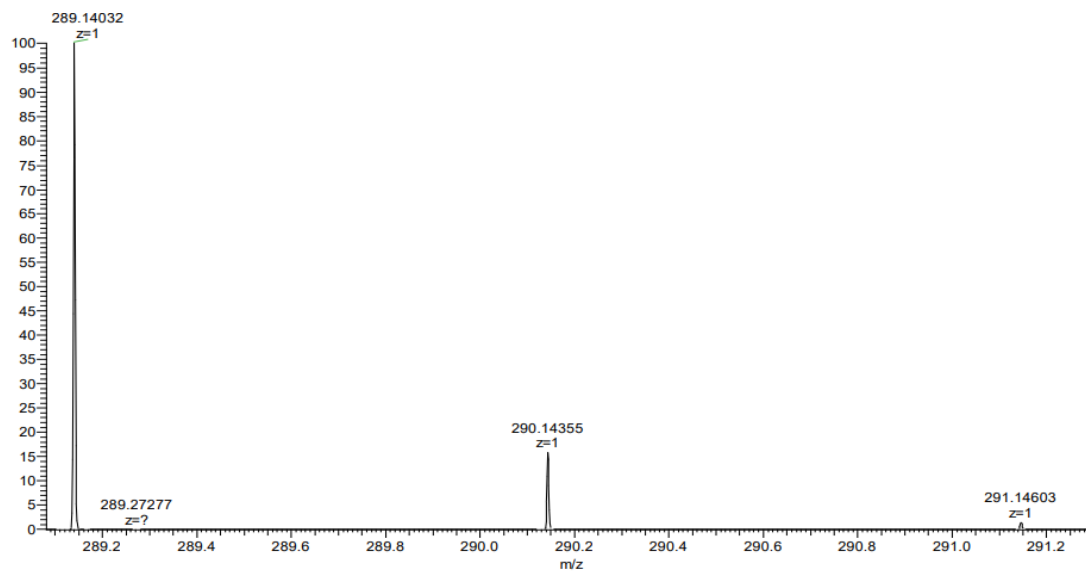

| m/z       | Theo. Mass | Delta (ppm) | RDB equiv. | Composition   |      |
|-----------|------------|-------------|------------|---------------|------|
| 289.14032 | 289.14103  | -2.46       | 4.5        | C15 H22 O4 Na | M+Na |

Figure S26. HRESIMS spectrum of 2', related to Figure 1.

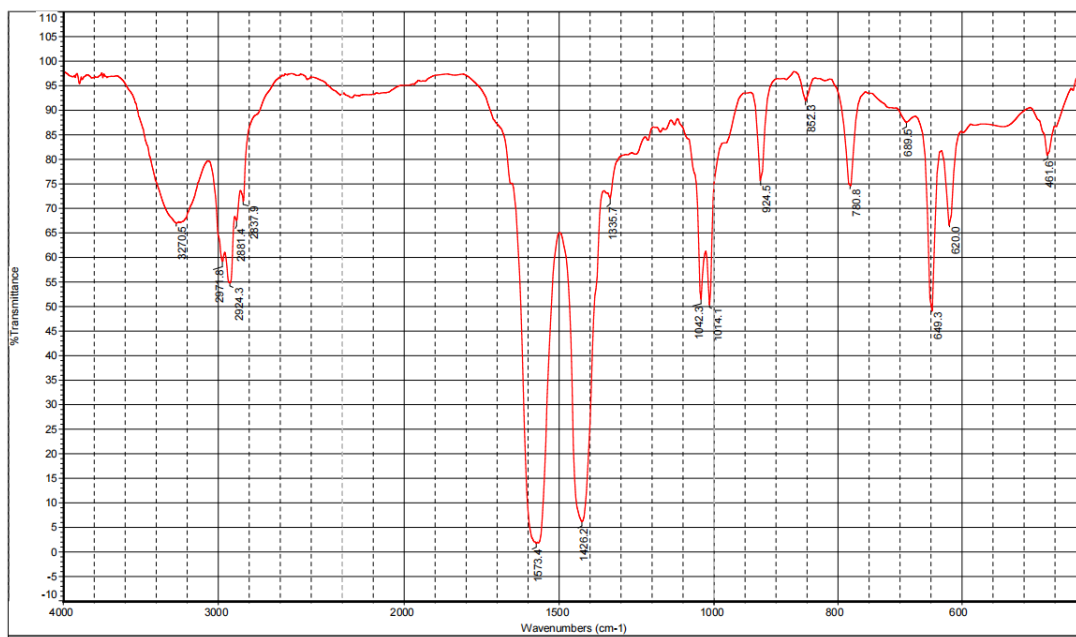

Figure S27. IR spectrum of 2', related to Figure 1.

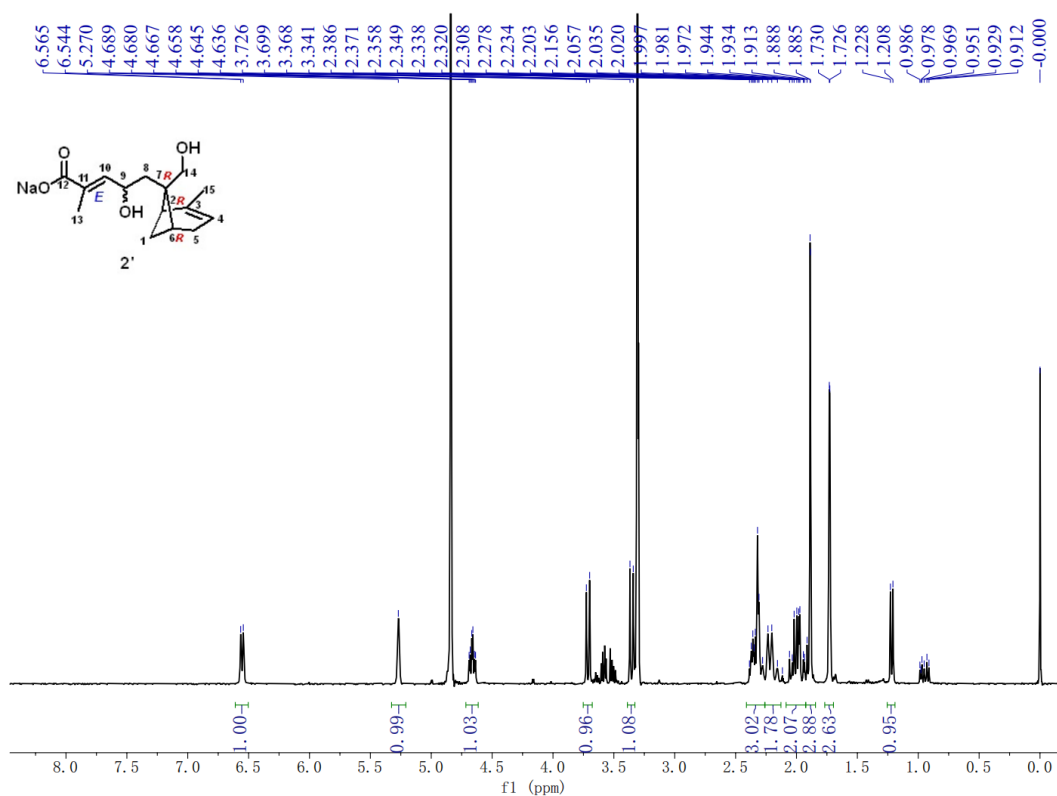

Figure S28. <sup>1</sup>H NMR spectrum (500 MHz) of 2' in CD<sub>3</sub>OD, related to Figure 1 and Table 1.

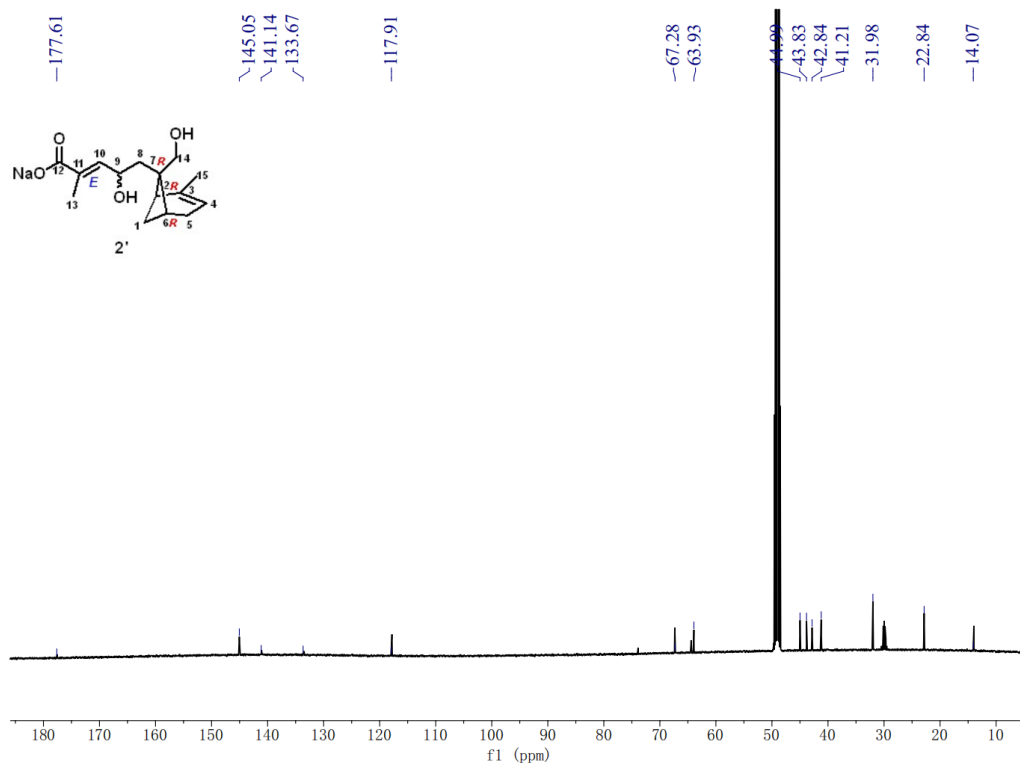

Figure S29.  $^{13}\text{C}$  NMR spectrum (125 MHz) of 2' in  $\text{CD}_3\text{OD}$ , related to Figure 1 and Table 1.

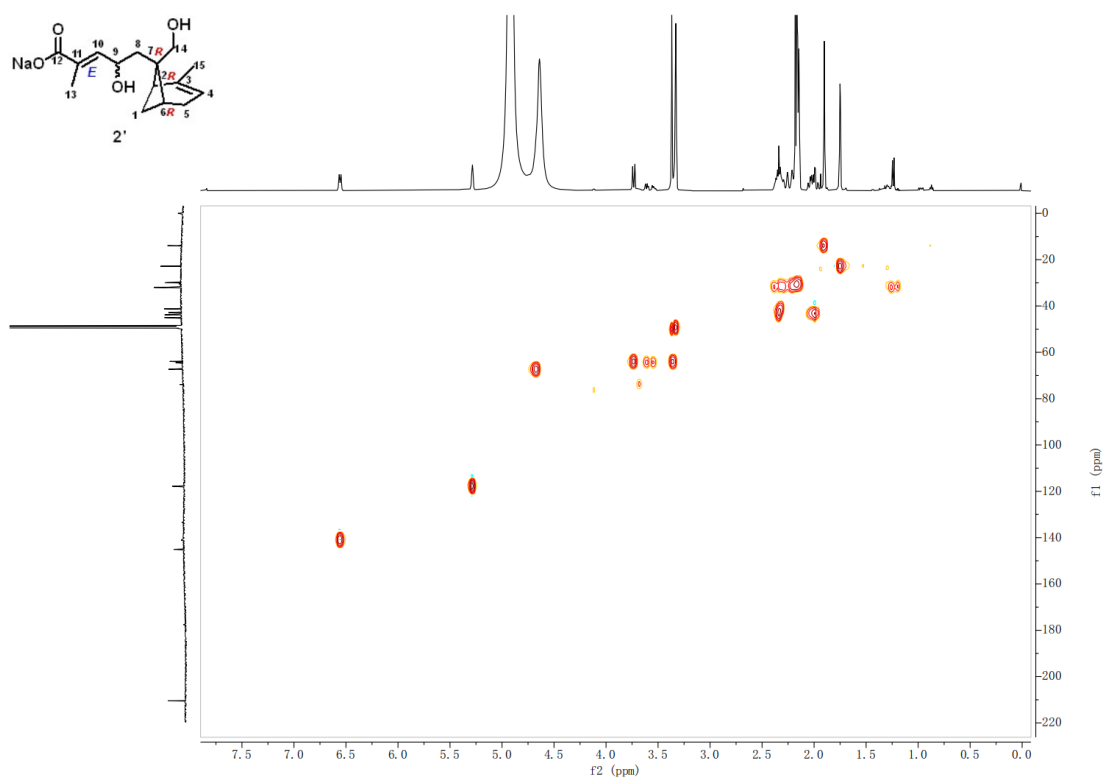

Figure S30. HSQC spectrum of 2' in  $\text{CD}_3\text{OD}$ , related to Figure 1.



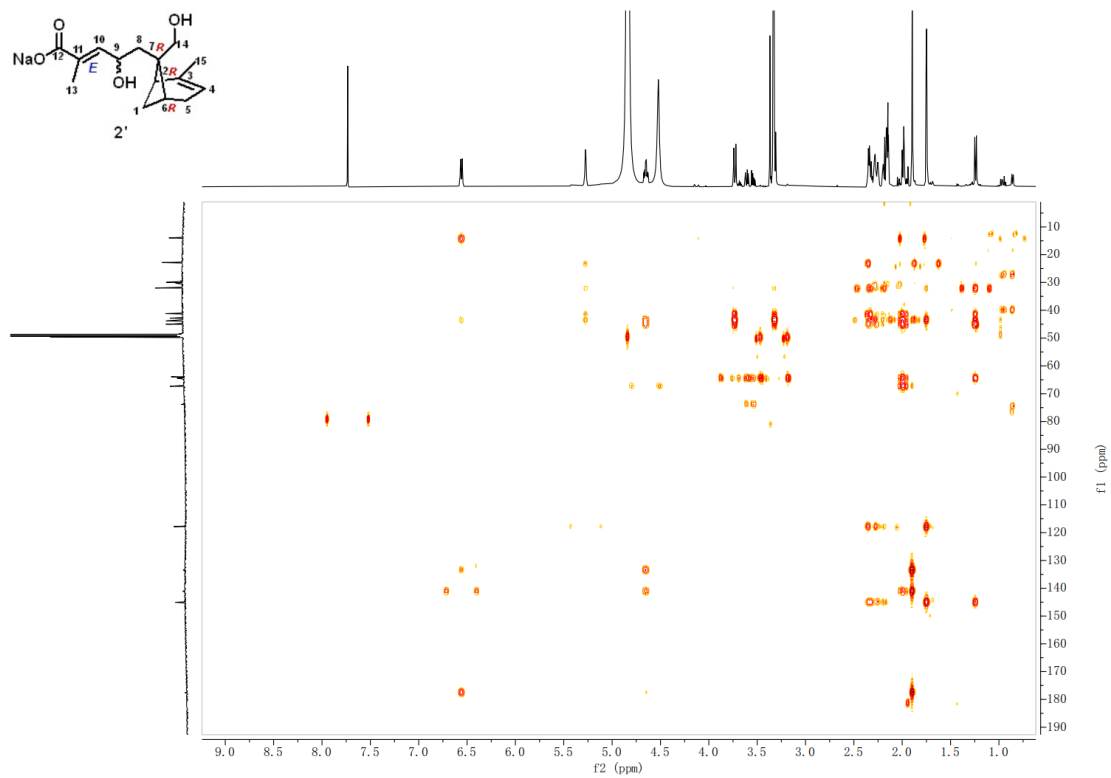

Figure S31. HMBC spectrum of 2' in CD<sub>3</sub>OD, related to Figure 1.

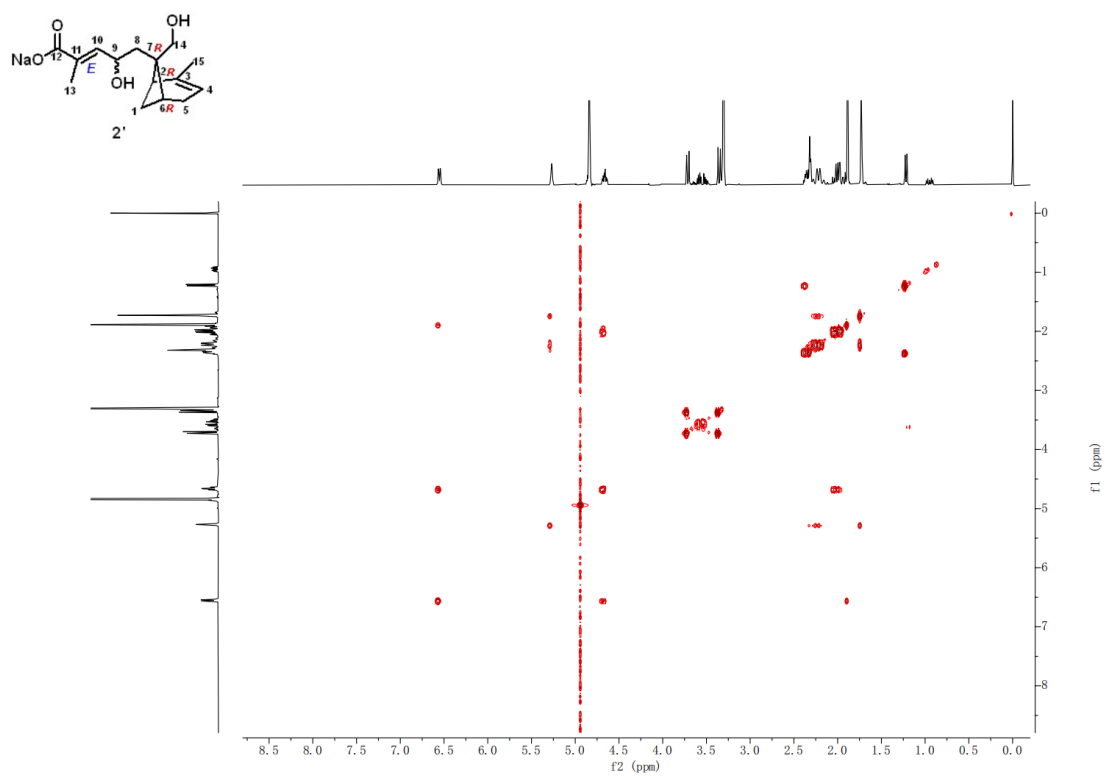

Figure S32. <sup>1</sup>H-<sup>1</sup>H COSY spectrum of 2' in CD<sub>3</sub>OD, related to Figure 1.

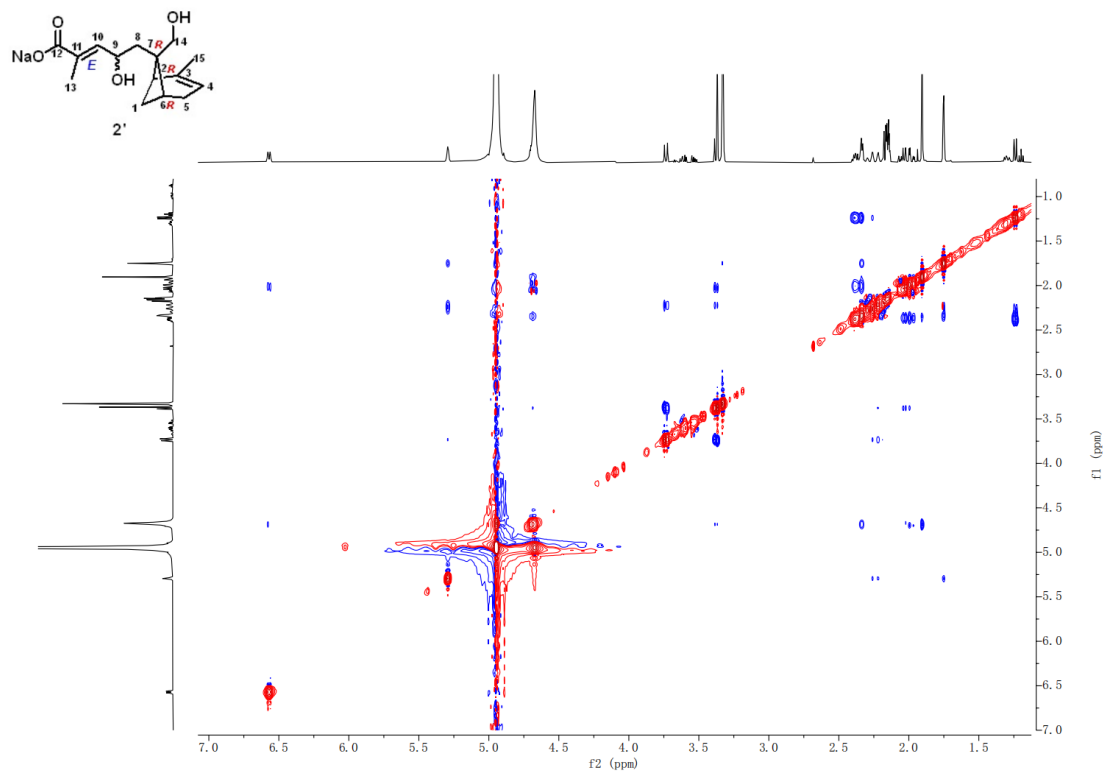

Figure S33. ROESY spectrum of 2' in CD<sub>3</sub>OD, related to Figure 1.

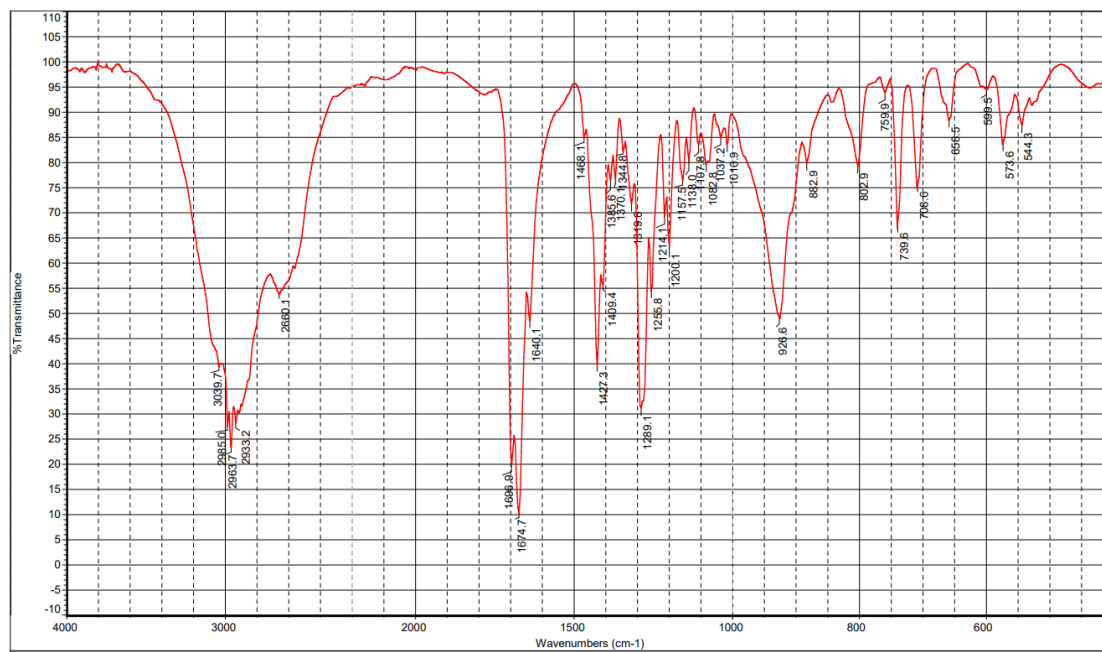

Figure S34. IR spectrum of 3, related to Figure 2.

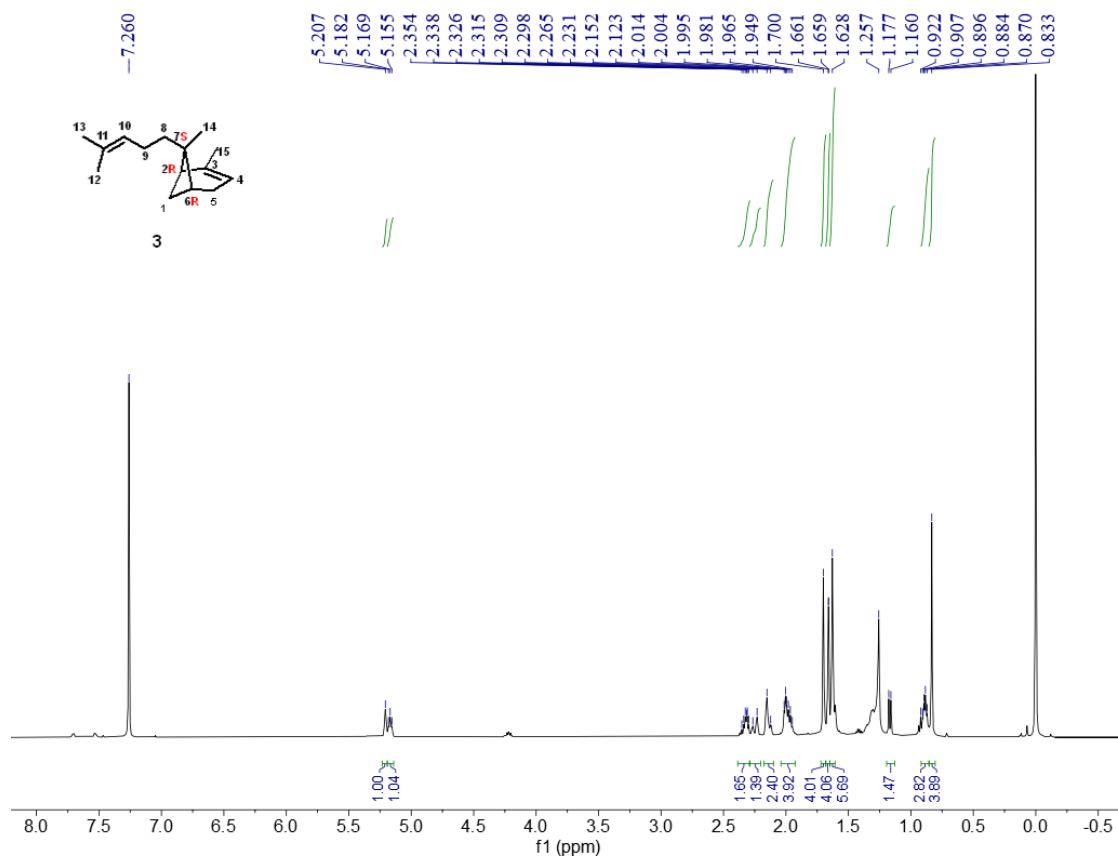

Figure S35. <sup>1</sup>H NMR spectrum (500 MHz) of 3 in CDCl<sub>3</sub>, related to Figure 2 and Table S2.

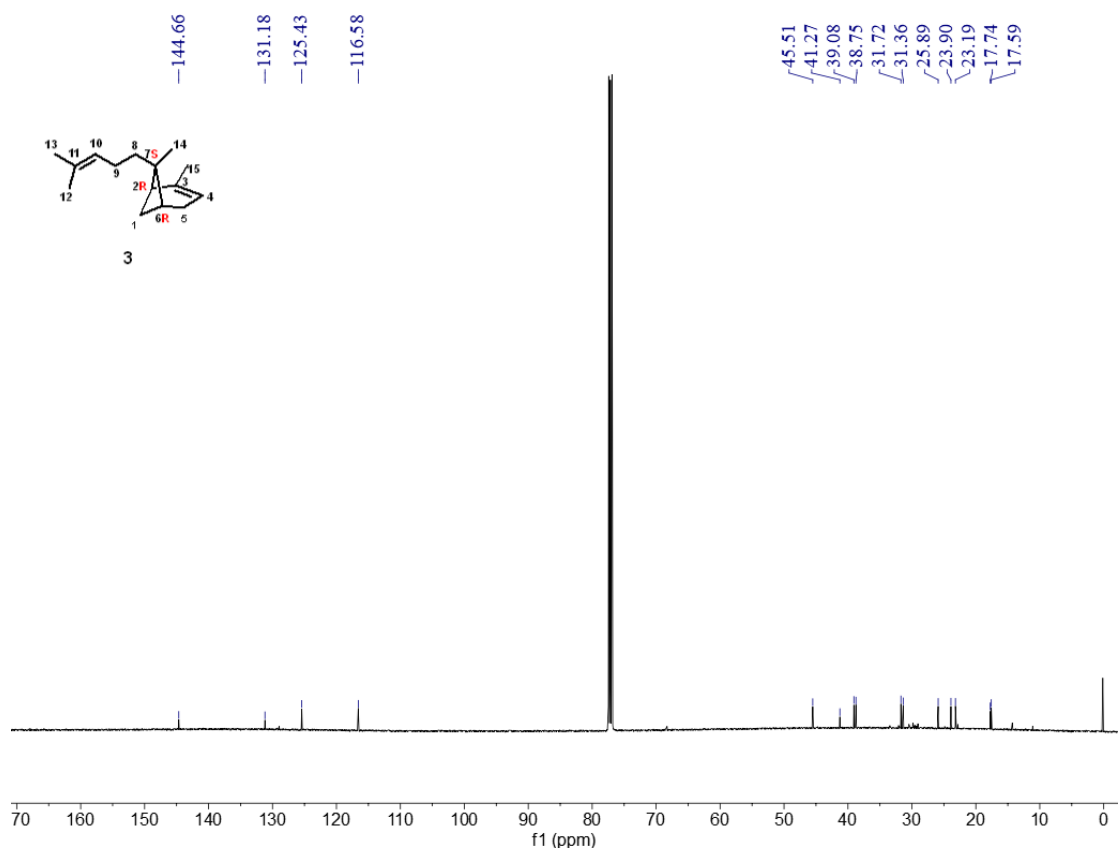

Figure S36. <sup>13</sup>C NMR spectrum (125 MHz) of 3 in CDCl<sub>3</sub>, related to Figure 2 and Table S2.

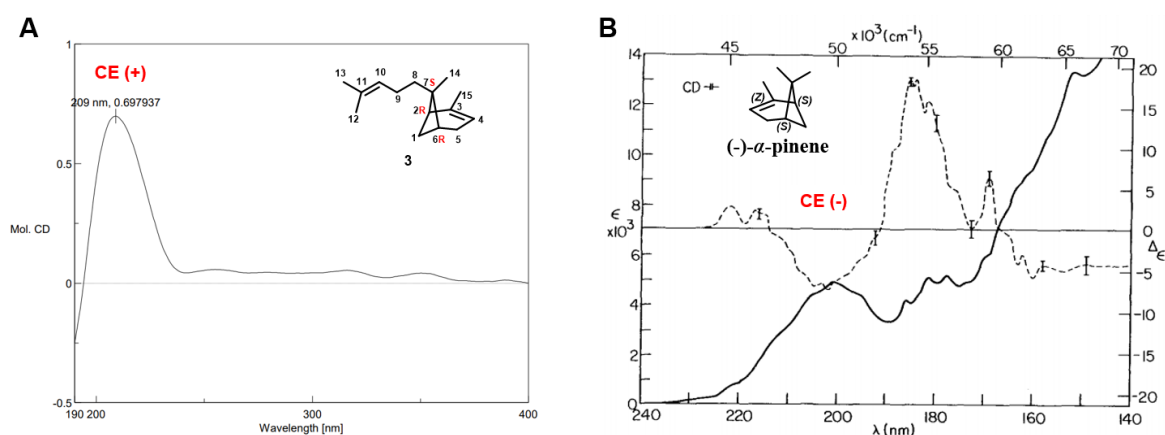

**Figure S37. Comparison CD spectrum of 3 with that of (-)- $\alpha$ -pinene, related to Figure 2.**

(A) CD spectrum of 3 in *n*-hexane, 209nm, CE (+);

(B) The absorption and CD spectra of (-)- $\alpha$ -pinene in ref [The Journal of Chemical Physics 59(3):1092-1098], Fig2, Table 2, 202nm, CE (-).

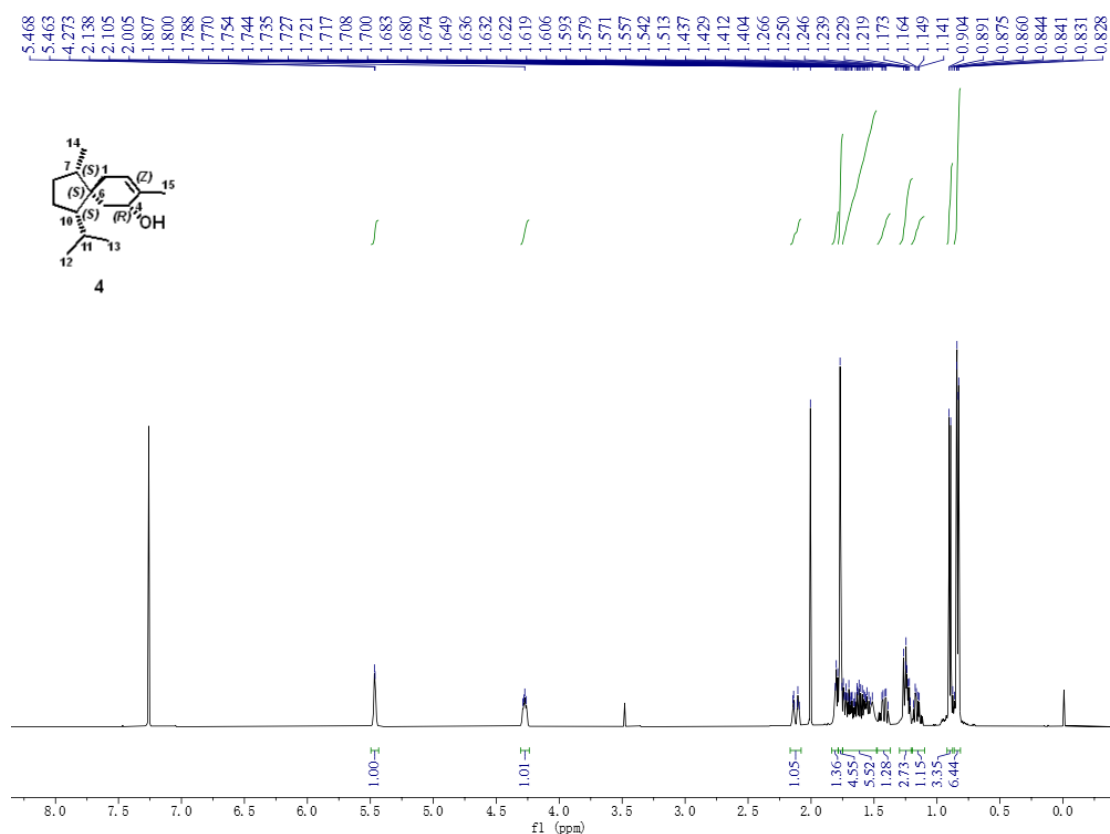

**Figure S38.  $^1\text{H}$  NMR spectrum (500 MHz) of 4 in  $\text{CDCl}_3$ , related to Figure 2 and Table S3.**

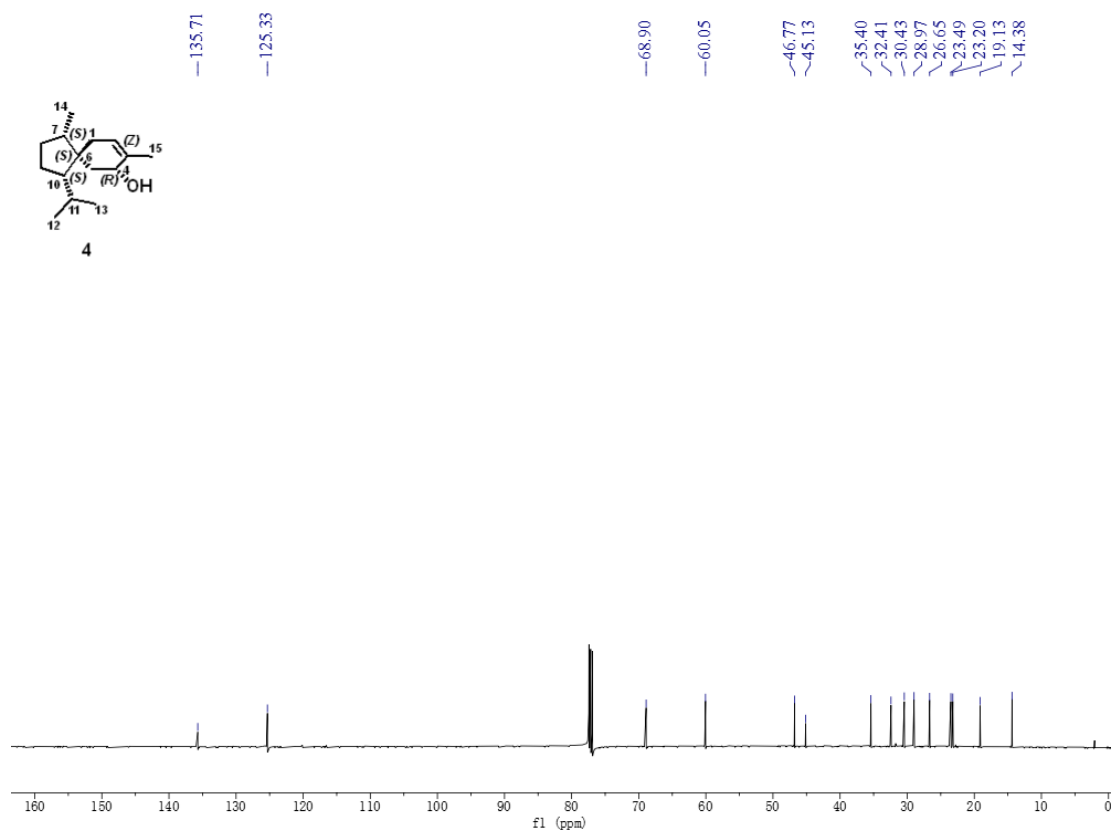

Figure S39.  $^{13}\text{C}$  NMR spectrum (125 MHz) of 4 in  $\text{CDCl}_3$ , related to Figure 2 and Table S3.

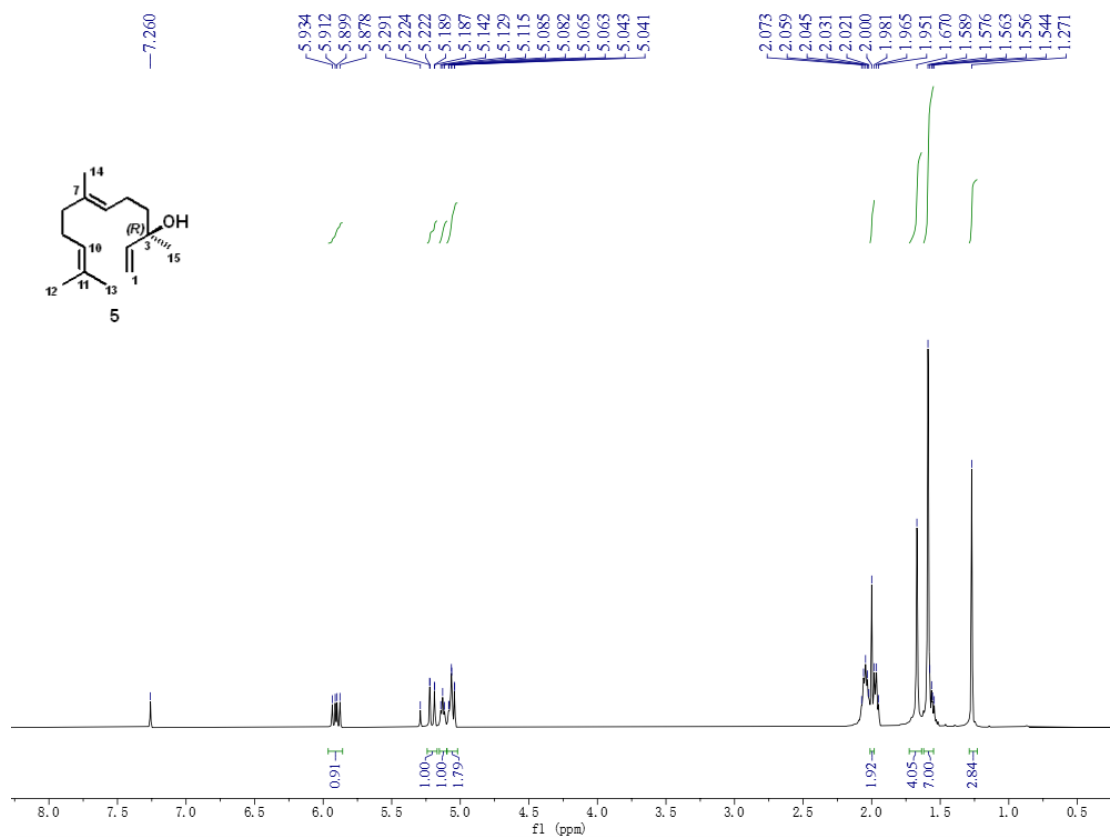

Figure S40.  $^1\text{H}$  NMR spectrum (500 MHz) of 5 in  $\text{CDCl}_3$ , related to Figure 4 and Table S3.

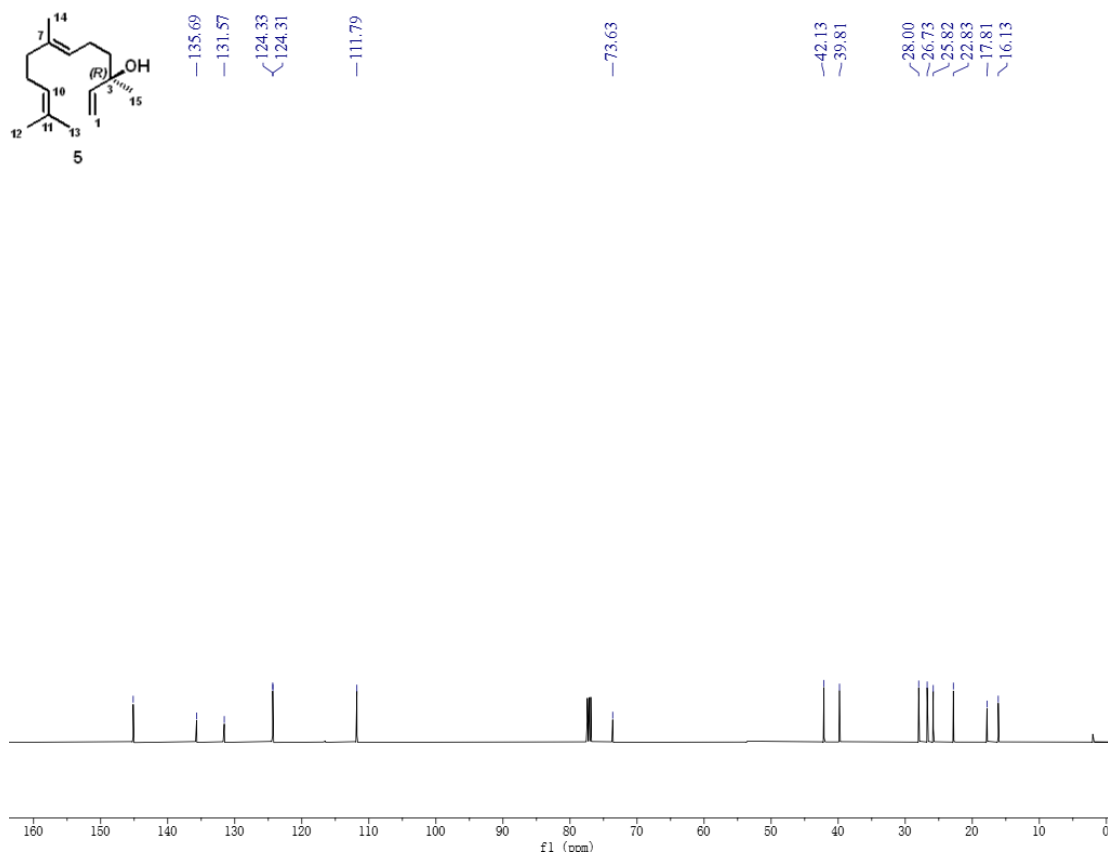

Figure S41. <sup>13</sup>C NMR spectrum (125 MHz) of 5 in CDCl<sub>3</sub>, related to Figure 4 and Table S3.

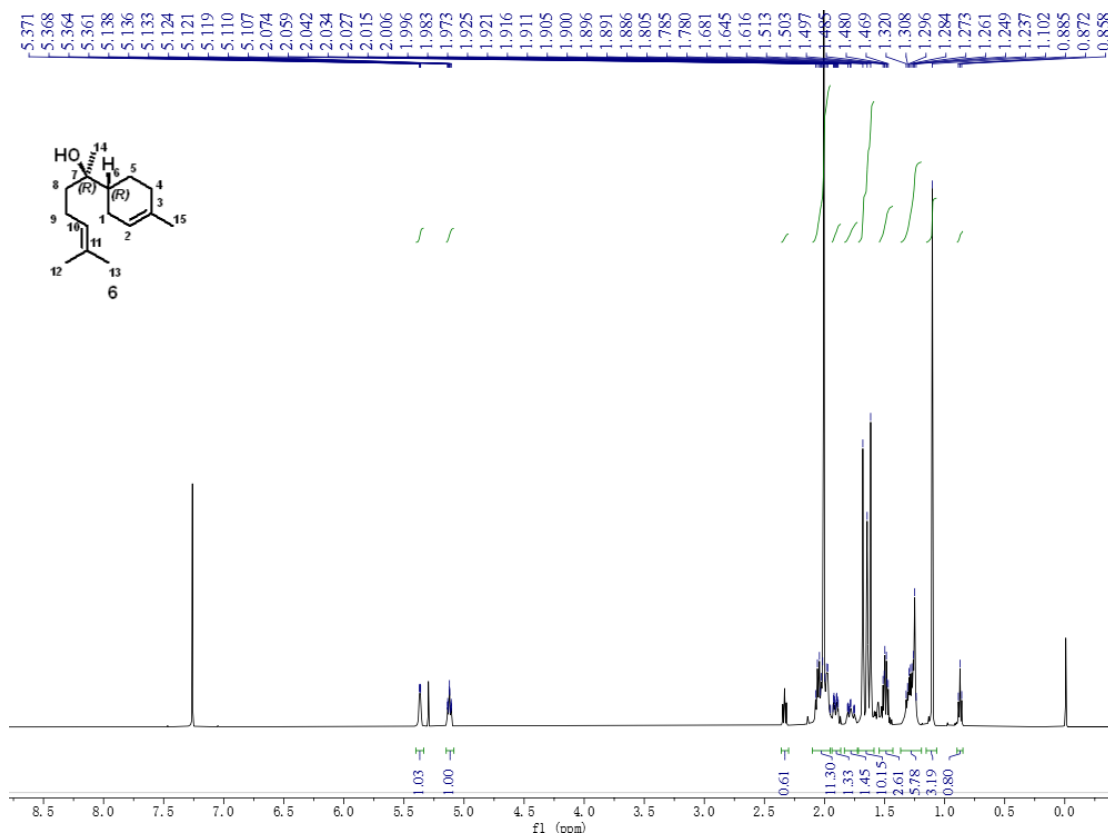

Figure S42. <sup>1</sup>H NMR spectrum (500 MHz) of 6 in CDCl<sub>3</sub>, related to Figure 4 and Table S3.

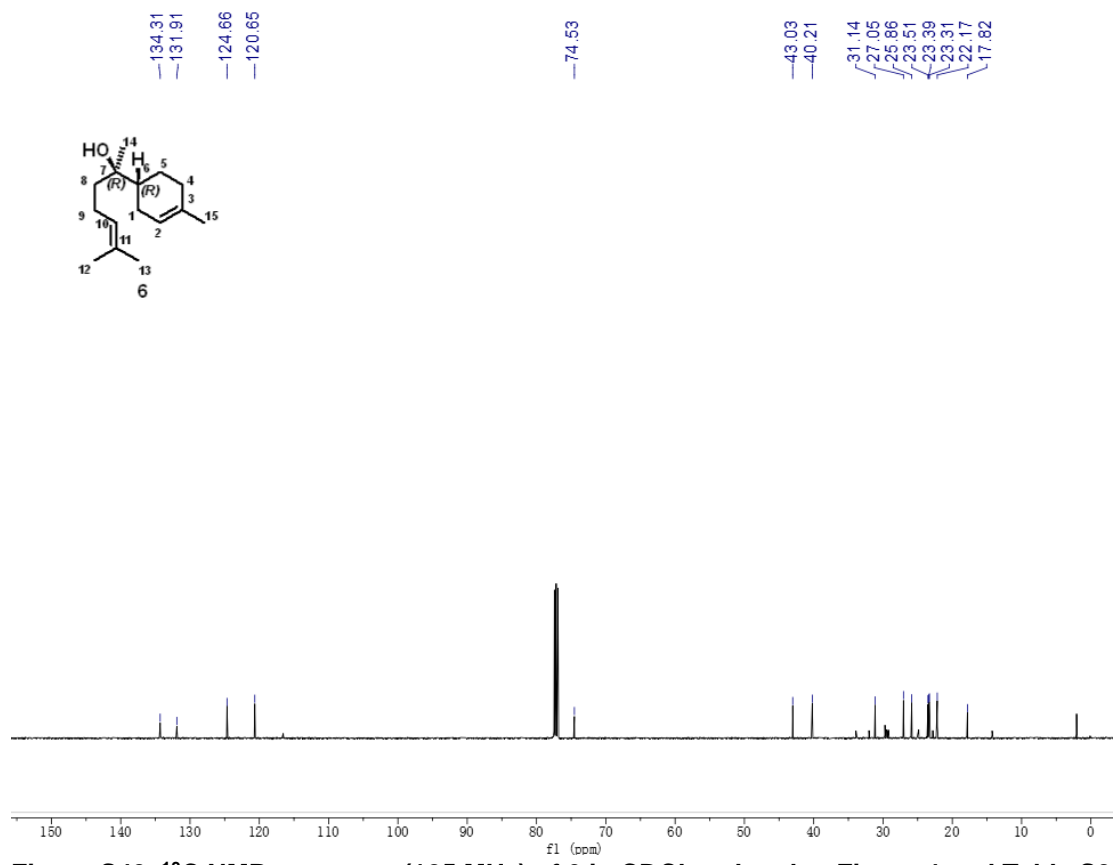

Figure S43. <sup>13</sup>C NMR spectrum (125 MHz) of 6 in CDCl<sub>3</sub>, related to Figure 4 and Table S3.

## Supplementary Tables

**Table S1. Crystal data and structure refinement for 1, related to Figure 1.**

---

|                                             |                                                               |
|---------------------------------------------|---------------------------------------------------------------|
| Identification code                         | 206_3_auto                                                    |
| Empirical formula                           | C <sub>15</sub> H <sub>20</sub> O <sub>4</sub>                |
| Formula weight                              | 264.31                                                        |
| Temperature/K                               | 99.9(3)                                                       |
| Crystal system                              | triclinic                                                     |
| Space group                                 | P1                                                            |
| a/Å                                         | 7.22070 (10)                                                  |
| b/Å                                         | 7.6941 (2)                                                    |
| c/Å                                         | 13.1723 (3)                                                   |
| α/°                                         | 93.095 (2)                                                    |
| β/°                                         | 99.137 (2)                                                    |
| γ/°                                         | 94.224 (2)                                                    |
| Volume/Å <sup>3</sup>                       | 718.96 (3)                                                    |
| Z                                           | 2                                                             |
| ρ <sub>calc</sub> /cm <sup>3</sup>          | 1.221                                                         |
| μ/mm <sup>-1</sup>                          | 0.717                                                         |
| F(000)                                      | 284.0                                                         |
| Crystal size/mm <sup>3</sup>                | 0.11 × 0.09 × 0.03                                            |
| Radiation                                   | Cu Kα (λ = 1.54184)                                           |
| 2θ range for data collection/°              | 6.812 to 148.786                                              |
| Index ranges                                | -8 ≤ h ≤ 8, -9 ≤ k ≤ 9, -16 ≤ l ≤ 15                          |
| Reflections collected                       | 26108                                                         |
| Independent reflections                     | 5336 [R <sub>int</sub> = 0.0238, R <sub>sigma</sub> = 0.0159] |
| Data/restraints/parameters                  | 5336/3/352                                                    |
| Goodness-of-fit on F <sup>2</sup>           | 1.074                                                         |
| Final R indexes [I ≥ 2σ (I)]                | R1 = 0.0325, wR2 = 0.0889                                     |
| Final R indexes [all data]                  | R1 = 0.0334, wR2 = 0.0895                                     |
| Largest diff. peak/hole / e Å <sup>-3</sup> | 0.27/-0.15                                                    |
| Flack parameter                             | 0.01(6)                                                       |

---



Table S2. The  $^1\text{H}$  NMR (500 MHz) and  $^{13}\text{C}$  NMR (125 MHz) data of **3** in  $\text{CDCl}_3$ , related to Figure 2, Figures S35–37.

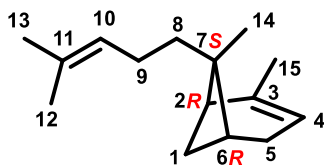

| No | $\delta_{\text{H}}$ mult. ( <i>J</i> in Hz) | $\delta_{\text{C}}$ |
|----|---------------------------------------------|---------------------|
| 1a | 1.17, d (8.5)                               | 31.7                |
| 1b | 2.31, m                                     |                     |
| 2  | 2.01, m                                     | 45.5                |
| 3  |                                             | 144.7               |
| 4  | 5.20, brs                                   | 116.6               |
| 5  | 2.13, m, 2.25, m                            | 31.4                |
| 6  | 2.15, m                                     | 39.1                |
| 7  |                                             | 41.3                |
| 8  | 1.66, m (2H)                                | 38.8                |
| 9  | 1.98, m (2H)                                | 23.89               |
| 10 | 5.17, t (6.0)                               | 125.4               |
| 11 |                                             | 131.2               |
| 12 | 1.63, s (3H)                                | 17.7                |
| 13 | 1.70, s (3H)                                | 25.9                |
| 14 | 0.83, s (3H)                                | 17.6                |
| 15 | 1.66, s (3H)                                | 23.2                |

Table S3. The  $^{13}\text{C}$  NMR (125 MHz) data of 4–6 in  $\text{CDCl}_3$ , related to Figure 2 and Figure 4.

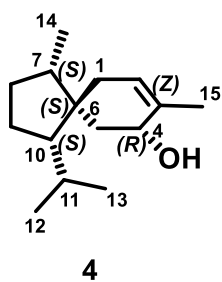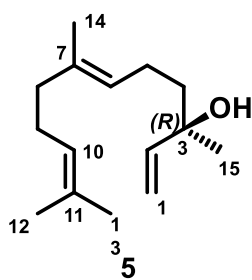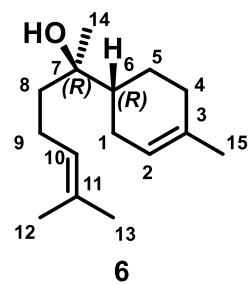

| No | 4     | 5     | 6     |
|----|-------|-------|-------|
| 1  | 35.4  | 111.8 | 27.0  |
| 2  | 125.3 | 145.2 | 120.6 |
| 3  | 135.7 | 73.6  | 134.3 |
| 4  | 68.9  | 42.1  | 31.1  |
| 5  | 32.4  | 26.7  | 22.2  |
| 6  | 45.1  | 124.3 | 43.0  |
| 7  | 46.8  | 135.7 | 74.5  |
| 8  | 29.0  | 39.8  | 40.2  |
| 9  | 26.7  | 28.0  | 23.3  |
| 10 | 60.0  | 124.4 | 124.7 |
| 11 | 30.4  | 131.6 | 131.9 |
| 12 | 23.5  | 16.1  | 17.8  |
| 13 | 23.2  | 22.8  | 25.9  |
| 14 | 14.4  | 17.8  | 23.5  |
| 15 | 19.1  | 25.8  | 23.4  |

**Table S4. Homologues and conserved domains of the proteins in the *nec* cluster, related to Figure 2.**

| <b>Protein</b>   | <b>Size (aa)</b> | <b>homology (swissprot)</b>  | <b>Identities/Positives</b> | <b>Conserved domains</b>                                       |
|------------------|------------------|------------------------------|-----------------------------|----------------------------------------------------------------|
| NecA             | 358              | Quinone oxidoreductase PIG3  | 36/52 %                     | PIG3 p53-inducible quinone oxidoreductase                      |
| NecB             | 525              | Tryprostatin B 6-hydroxylase | 43/61 %                     | CYP67-like (hydroxylation)                                     |
| NecC             | 494              | CYP450 monooxygenase AMT3    | 38/60 %                     | CYP60B-like (hydroxylation)                                    |
| NecD<br>(NsBERS) | 435              | Terpene cyclase ancC         | 24/44 %                     | Non-plant terpene cyclases                                     |
| NecE             | 520              | <i>Ent</i> -kaurene oxidase  | 29/51 %                     | CYP503A1-like<br>(three successive oxidations / demethylation) |

**Table S5. Predicted functions and conserved domains of the proteins in the *lach* cluster, related to Figure 2.**

| <b>Protein</b>    | <b>Accession number</b> | <b>Size(aa)</b> | <b>Predicted functions</b>     | <b>Conserved domains</b>                                       |
|-------------------|-------------------------|-----------------|--------------------------------|----------------------------------------------------------------|
| LachA             | TVY81922.1              | 355             | NAD(P)H quinone oxidoreductase | PIG3 p53-inducible quinone oxidoreductase                      |
| LachB<br>(LsBERS) | TVY81921.1              | 444             | Terpene Synthase               | Non-plant terpene cyclases                                     |
| LachC             | -                       | 442             | Cytochrome P450                | CYP503A1-like<br>(three successive oxidations / demethylation) |
| LachD             | TVY81920.1              | 537             | Cytochrome P450                | CYP67-like (hydroxylation)                                     |
| LachE             | TVY81918.1              | 384             | Cytochrome P450                | CYP503A1-like<br>(three successive oxidations / demethylation) |

**Table S6. Homology search of NsBERS in NCBI, related to Figure 3.**

| <b>Description</b>                       | <b>Strain</b>                            | <b>coverage</b> | <b>Identity</b> | <b>Accession</b> |
|------------------------------------------|------------------------------------------|-----------------|-----------------|------------------|
| BcSTC4, sesquiterpene cyclase            | <i>Metarhizium majus</i><br>ARSEF 297    | 91%             | 65.95%          | KID93366.1       |
| BcSTC4, sesquiterpene cyclase            | <i>Metarhizium guizhouense</i> ARSEF 977 | 91%             | 65.78%          | KID81896.1       |
| hypothetical protein LSUE1_G003745       | <i>Lachnellula suecica</i>               | 91%             | 62.09%          | TVY81921.1       |
| hypothetical protein EAE99_001473        | <i>Botrytis elliptica</i>                | 92%             | 56.62%          | KAF7939668.1     |
| putative sesquiterpene cyclase protein   | <i>Botrytis cinerea</i> BcDW1            | 93%             | 54.74%          | EMR81374.1       |
| BcSTC4, similar to sesquiterpene cyclase | <i>Botrytis cinerea</i> T4               | 93%             | 54.74%          | CCD49915.2       |
| hypothetical protein GJ744_011298        | <i>Endocarpon pusillum</i>               | 91%             | 56.78%          | KAF7513032.1     |
| Bcstc4                                   | <i>Botrytis cinerea</i> B05.10           | 93%             | 54.50%          | XP_001546971.2   |
| uncharacterized protein EAE98_003830     | <i>Botrytis deweyae</i>                  | 92%             | 55.88%          | XP_038811923.1   |
| hypothetical protein EV356DRAFT_562544   | <i>Viridothelium virens</i>              | 89%             | 55.36%          | KAF2228525.1     |
| hypothetical protein COCHEDRAFT_1083047  | <i>Bipolaris maydis</i> C5               | 88%             | 55.93%          | EMD94346.1       |
| hypothetical protein COCC4DRAFT_58253    | <i>Bipolaris maydis</i> ATCC<br>48331    | 88%             | 55.78%          | XP_014081267.1   |
| hypothetical protein COCMIDRAFT_37699    | <i>Bipolaris oryzae</i> ATCC<br>44560    | 84%             | 56.60%          | XP_007689029.1   |
| uncharacterized protein EAF02_006039     | <i>Botrytis sinoallii</i>                | 98%             | 53.01%          | XP_038758304.1   |
| hypothetical protein BELL_0648g00110     | <i>Botrytis elliptica</i>                | 92%             | 54.41%          | TGO70911.1       |
| hypothetical protein EAF03_005474        | <i>Botryotinia squamosa</i>              | 92%             | 54.17%          | KAF7866352.1     |
| hypothetical protein BGAL_0106g00160     | <i>Botrytis galanthina</i>               | 87%             | 52.58%          | THV51576.1       |
| hypothetical protein IFR05_015310        | <i>Cadophora</i> sp. M221                | 99%             | 45.49%          | KAG4429207.1     |
| hypothetical protein KY384_006558        | <i>Bacidia gigantensis</i>               | 88%             | 48.97%          | KAG8528869.1     |
| putative sesquiterpene cyclase protein   | <i>Botrytis fragariae</i>                | 64%             | 60.92%          | XP_037188555.1   |
| hypothetical protein BOTCAL_0446g00010   | <i>Botryotinia calthae</i>               | 79%             | 52.11%          | TEY39953.1       |

**Table S7. Primers used for this study, related to STAR Methods.**

| <b>Primer name</b>  | <b>Primer sequence (5'→3')</b>                                |
|---------------------|---------------------------------------------------------------|
| pYTU-Nec04-F        | <u>CTTCATCCCCAGCATCATTACACCTCAGCAATGGCTTCCGTCAGCACC</u>       |
| pYTU-Nec04-R        | <u>GGGATCCACTAGTTCTAGAGCGGCCGCCCTCAGCTCGGGGGTCGGGAATAATTC</u> |
| pYTU-NecD-F         | <u>CTTCATCCCCAGCATCATTACACCTCAGCAATGAAAAGCTTCTGTACTGG</u>     |
| pYTU-NecD-R         | <u>GGGATCCACTAGTTCTAGAGCGGCCGCCCTGACGATCCATCGAG</u>           |
| pYTU-Nec26-F        | <u>CTTCATCCCCAGCATCATTACACCTCAGCAATGTATAACACGGGGAGCC</u>      |
| pYTU-Nec26-R        | <u>GGGATCCACTAGTTCTAGAGCGGCCGCCGAGCAACATGCAAGGGAGAC</u>       |
| U-F                 | GAAGTGGTTGGTCGGGGTTC                                          |
| U-R                 | CTGACTTCAACACAGTGG                                            |
| pESC-URA-NsBERS-F   | <u>CAAGGAGAAAAAACCCCGGATCCATGAAAAGCTTCTGTACTGG</u>            |
| pESC-URA-NsBERS-R   | <u>GAAATCAACTTCTGTTCCATGTCGACTTACCACGAGGGGTCAATAG</u>         |
| pET28a-MBP-NsBERS-F | <u>GCCATCATCATCATCACGGATCCATGAAAAGCTTCTGTACTGG</u>            |
| pET28a-MBP-NsBERS-R | <u>GTGGTGGTGCTCGAGTGC GGCCGCTTACCACGAGGGGTCAATAG</u>          |
| pET28a-MBP-LsBERS-F | <u>GCCATCATCATCATCACGGATCCATGAGTCTGCCAGCTTC</u>               |
| pET28a-MBP-LsBERS-R | <u>GTGGTGGTGCTCGAGTGC GGCCGCTCAACTAGTGTACTGTGG</u>            |
| pET28a-BcBOS-F      | <u>CAGCAAATGGGTGCGGGATCCATGGCTCAAATTATGACTTCAGCTG</u>         |
| pET28a-BcBOS-R      | <u>GTGGTGGTGCTCGAGTGC GGCCGCTACGTCAGCTTGGCAG</u>              |

**Table S8. Plasmids used for this study, related to STAR Methods.**

| <b>Plasmid name</b> | <b>Genes</b>                           | <b>Aim</b>                          |
|---------------------|----------------------------------------|-------------------------------------|
| pYTU-Nec04          | <i>nec04</i> from gDNA                 | <i>A. nidulans</i> overexpression   |
| pYTU-NecD           | <i>necD</i> from gDNA                  | <i>A. nidulans</i> overexpression   |
| pYTU-Nec26          | <i>nec26</i> from gDNA                 | <i>A. nidulans</i> overexpression   |
| pESC-URA-NsBERS     | <i>necD</i> from cDNA                  | <i>S. cerevisiae</i> overexpression |
| pESC-URA-LsBERS     | <i>lachB</i> from synthesized sequence | <i>S. cerevisiae</i> overexpression |
| pESC-URA-BcBOS      | <i>bcbos</i> from synthesized sequence | <i>S. cerevisiae</i> overexpression |
| pET28a-MBP-NsBERS   | <i>necD</i> from cDNA                  | <i>E. coli</i> overexpression       |
| pET28a-MBP-LsBERS   | <i>lachB</i> from synthesized sequence | <i>E. coli</i> overexpression       |
| pET28a-BcBOS        | <i>bcbos</i> from synthesized sequence | <i>E. coli</i> overexpression       |
